# Supplementary material
Source: PubMed Central journal article supplement (PMC3527004)
Supplement: NIHMS37889-supplement-1.pdf [file NIHMS37889-supplement-1.pdf]

# **Chemical chaperones assist folding through different mechanisms to buffer mutational variations**

Anannya Bandyopadhyay, Kanika Saxena, Neha Kasturia, Vijit Dalal, Niraj Bhatt, Asher Rajkumar, Shuvadeep Maity, Shantanu Sengupta, Kausik Chakraborty

## **Supplemental Information**

### **Supplemental Methods**

1. Supplemental Experimental Procedures Page 3

### Tables and legends

2. Table 1 Page 14
3. Table 2 Page 17
4. Table 3 Page 24
5. Supplemental References Page 25

## Supplemental Results

|    |           |                     |    |
|----|-----------|---------------------|----|
| 6  | Figure 1  | Related to Figure 1 | 26 |
| 7  | Figure 2  | Related to Figure 1 | 27 |
| 8  | Figure 3  | Related to Figure 1 | 29 |
| 9  | Figure 4  | Related to Figure 1 | 30 |
| 10 | Figure 5  | Related to Figure 1 | 31 |
| 11 | Figure 6  | Related to Figure 1 | 32 |
| 12 | Figure 7  | Related to Figure 1 | 33 |
| 13 | Figure 8  | Related to Figure 1 | 34 |
| 14 | Figure 9  | Related to Figure 1 | 35 |
| 15 | Figure 10 | Related to Figure 1 | 36 |
| 16 | Figure 11 | Related to Figure 2 | 37 |
| 17 | Figure 12 | Related to Figure 2 | 38 |
| 18 | Figure 13 | Related to Figure 2 | 39 |
| 19 | Figure 14 | Related to Figure 2 | 40 |
| 20 | Figure 15 | Related to Figure 2 | 41 |
| 21 | Figure 16 | Related to Figure 2 | 42 |
| 22 | Figure 17 | Related to Figure 2 | 43 |
| 23 | Figure 18 | Related to Figure 3 | 44 |
| 24 | Figure 19 | Related to Figure 3 | 45 |
| 25 | Figure 20 | Related to Figure4  | 46 |
| 26 | Figure 21 | Related to Figure 4 | 47 |
| 27 | Figure 22 | Related to Figure4  | 48 |
| 28 | Figure 23 | Related to Figure4  | 49 |
| 29 | Figure 24 | Related to Figure4  | 50 |
| 30 | Figure 25 | Related to Figure4  | 51 |
| 31 | Figure 26 | Related to Figure4  | 52 |
| 32 | Figure 27 | Related to Figure4  | 53 |
| 33 | Figure 28 | Related to Figure 5 | 54 |
| 34 | Figure 29 | Related to Figure 5 | 55 |
| 35 | Figure 30 | Related to Figure 5 | 56 |
| 36 | Figure 31 | Related to Figure 5 | 57 |
| 37 | Figure 32 | Related to Figure 5 | 58 |
| 38 | Figure 33 | Related to Figure 5 | 59 |
| 39 | Figure 34 | Related to Figure 5 | 60 |

## **SUPPLEMENTAL EXPERIMENTAL PROCEDURES:**

### **Chemicals and Reagents**

All the chemicals used in this study were from commercial sources and were of analytical grade. Media components, fine chemicals and reagents were purchased from Sigma Aldrich (St Louis), HiMedia (Mumbai, India). Oligonucleotides were purchased from Sigma Aldrich. KAPA HiFi HotStart ReadyMix obtained from KAPA Biosystems. Gel extraction kit obtained from Qiagen (Valencia, CA), AntiMBP polyclonal antisera obtained from New England Biolabs (Beverly, MA) and Goat Anti-Rabbit horseradish peroxidase-linked antibody were bought from GeneScript. Immobilon PVDF membrane and chemiluminescence reagent for western blotting purchased from Millipore (Billerica, MA). Antibodies against DnaK, and GroEL were obtained from Assay Design and anti-TF antibody was obtained from Genscript.  $\Delta$ dnaK and  $\Delta$ otsA deletion strains were obtained from the E. coli genetic stock centre at Yale University.

**Site Specific Mutagenesis of Gentamicin acetyl-transferase gene (Gm-R):** Primers were designed to replace each of the two adjacent amino acid residues with glycine and were obtained as reverse primers in 96-well format (Sigma). Pair of amino acid residues starting from position 5th till 172th were replaced by two Glycine residues using mega primer based method of site-directed mutagenesis. First reaction was carried out in 96-well PCR plate, with each well having specific mutagenic primer and a forward template-specific primer. Twenty five cycles of PCR were carried out at annealing temperature of 55<sup>0</sup>C. Short product obtained, served as mega-primer to obtain full-length mutant plasmid. Thirty cycles of long PCR were carried out with both annealing and extension steps performed at 72<sup>0</sup>C. WT template (Gentamicin Acetyl Transferase WT cloned into pBAD vector), was digested with DpnI followed by transformation into chemically competent *E.coli* (DH5 $\alpha$ ) from Invitrogen.

### **Screening for the effect of osmolytes on folding of Gm-R Double Glycine Mutants:**

Gentamicin double glycine variants transformed into *E.coli* strain DH5 $\alpha$  were plated onto LB-agar plates containing Ampicillin (100 $\mu$ g/ml), in small spots of 10 $\mu$ l. Mutant colonies were picked and inoculated in LB-Broth containing Ampicillin(100 $\mu$ g/ml) in 96-well plate and were grown overnight at 37<sup>0</sup>C. For checking effect of TMAO on growth of variants, secondary culture was inoculated in two parallel sets, control and test plate. Control plate contained Ampicillin(100 $\mu$ g/ml) and Gentamicin (7 $\mu$ g/ml) for selection, and Arabinose (0.1%) for inducing expression of gentamicin acetyl-transferase variants. Test plate contained TMAO (200mM)/proline(200mM)/glycerol(10%) in addition to the constituents present in control plate. In both the sets wild-type was inoculated in wells H11 and G11. Secondary cultures were grown overnight without shaking at 37<sup>0</sup>C. Growth of Wild-type and Variants, in presence and absence of TMAO, proline and glycerol, were checked by measuring absorbance at 600nm in an ELISA plate reader. Absorbance of the blank was subtracted and absorbance value for each mutant was normalised w.r.t Gm-R wt grown under the same media condition.

**Solubility of Gm-R Wt and Glycine duplet mutant N135G,A136G :** Both Gm-R Wt and GG mutant were grown in LB(control) and LB containing TMAO(200mM) with and without induction of protein expression. Cultures were grown till O.D 600nm reaches 0.6 and induced with 0.5% arabinose. Both induced and un-induced samples were allowed to grow overnight at 37<sup>0</sup>C. cells were harvested next day and resuspended in 100 $\mu$ l of Baclysis solution (GenScript )containing 1KU/ml of lysozyme(Sigma). Following resuspension samples were incubated at room temperature with constant mixing for 30min. Cells were lysed in three

cycles of freeze thaw. To separate out supernatant and pellet fractions cell lysate was centrifuged at 13,000g for 20 min. Supernatant was collected in separate tubes and pellet was resuspended in 100µl of PBS buffer. Protein concentration of the supernatant fractions were estimated using Bradford estimation method and equal amount of protein was loaded onto 12-15% polyacrylamide gel. For pellet fractions volume corresponding to respective soluble fraction was loaded. Gels were stained with coomassie brilliant blue and the image was scanned and analysed in ImageJ software <sup>1</sup> ( Rasband, W.S., ImageJ, U. S. National Institutes of Health, Bethesda, Maryland, USA, <http://imagej.nih.gov/ij/>, 1997-2011.)

**Targeted-Random Mutagenesis of Gm-R** : Library of Targeted-Random mutants was generated by replacing each amino acid of the Gm-R sequence by nineteen other amino acids. Reverse primers were designed such that each codon is replaced with NNK (N= any nucleotide, K= G or T), these were obtained in 96-well format(Sigma). First reaction was carried out in 96-well PCR plate, with each well having specific mutagenic primer and a forward template-specific primer. Twenty five cycles of PCR were carried out at annealing temperature of 55<sup>0</sup>C. Short product obtained, served as mega-primer to obtain full-length mutant plasmid. Thirty cycles of long PCR were carried out with both annealing and extension steps performed at 72<sup>0</sup>C. WT template (Gentamicin Acetyl Transferase WT cloned into pBAD vector), was digested with DpnI followed by transformation into chemically competent *E.coli*(DH5α) . Around fifty colonies were picked for each position and pooled for plasmid preparation. This pool of plasmids carrying mutant templates was transformed into *E.coli*-K12 BW25113 strain and plated onto LB-agar plates containing Ampicillin (100µg/ml). This plate was used as master plate for Replica plating onto control plate containing Ampicillin and Arabinose(0.5%) and test plate containing ampicillin, arabinose

and gentamicin (4µg/ml). 762 Inactive colonies were picked into LB-Broth containing Ampicillin(100µg/ml) in 96-deep well plates. Out of 762 inactive colonies 20 were sequenced and single site mutations were confirmed.

**Screening for the effect of osmolytes on folding of Gentamicin Random Mutants:**

Out of 762 inactive colonies, 500 were randomly picked for initial screening. These inactive mutants were grown in LB(control) and LB containing osmolytes, [TMAO(200mM)/ Proline(200mM)/ Glycerol(10%)/ NaCl(0.75M)] at 37<sup>0</sup>C without shaking. Both the test and control plates contained Ampicillin(100µg/ml), Arabinose(0.1%) and Gentamicin (8µg/ml).

**Minimum Inhibitory Concentration(MIC) study of Gm-R targeted random mutants :**

from screening experiment around 90 mutants that were found to be dependent on osmolytes for growth were picked up for MIC study. These mutants were grown overnight without shaking in LB containing Ampicillin(100µg/ml) and Arabinose(0.1%) at 37<sup>0</sup>C. Secondary inoculations were done in LB(control) and LB containing three different osmolytes: TMAO(200mM)/ Proline(200mM)/ Glycerol(10%) and six different gentamicin concentrations (0.5, 4, 8, 16, 32, 64 µg/ml). Growth in each condition was assessed by measuring absorbance at 600nm. Absorbance value for each of the mutant under all conditions was normalised w.r.t. its Sub-MIC Abs value

**Western Blotting Experiment :** E. Coli K-12 BW25113 was inoculated in plain LB and LB containing TMAO(200mM)/ Proline(200mM)/ Glycerol(10%) and was grown at 37<sup>0</sup>C for three hours. O.D 600nm was determined following which cells were harvested and resuspended in PBS buffer leading to 1:150 dilution of the absorbance value. Equal volume

of samples were loaded onto 12.5% poly-acrylamide gel. Proteins were transferred onto the PVDF membrane and were probed using DnaK, GroEL specific monoclonal antibody (assaydesigns) isolated from mouse and TF-tag(GeneScript), DnaJ(assaydesigns) specific polyclonal antibody isolated from Rabbit. All steps were performed on a SNAP-ID system from Millipore. Bands corresponding to DnaK and TF were probed on the same blot and GroEL and DnaJ were probed on another blot. Antibodies were stripped off by incubating in stripping buffer (62.5mM Tris,2%SDS,100mM  $\beta$ -ME, pH6.7) at 55<sup>0</sup>C for 10min. Blot was developed using HRPconjugated Goat anti-mouse and anti-Rabbit IgG (Genscript) and H<sub>2</sub>O<sub>2</sub> and luminol as substrates(Millipore).

**Microarray experiment :** E. Coli K-12 BW25113 was inoculated in plain LB and LB containing TMAO(200mM)/ Proline(200mM)/ Glycerol(10%) and was allowed to grow overnight at 37<sup>0</sup>C. Cells were harvested and resuspended in PBS buffer(100 $\mu$ l) and RNA later (500 $\mu$ l). Microarray experiments were performed by Genotypic Technology Pvt. Ltd., India. Briefly, total RNA was extracted by using Qiagen's RNeasy minikit. Polyadenylation and Precipitation (PAP) labeling was done followed by T7 promoter based-linear amplification to generate labeled complementary RNA. Hybridization was done onto Agilent gene expression E.coli 8X15k chip, using Agilent's In situ Hybridization kit.

**Microarray data analysis :** Data analysis has been done using GeneSpring GX version 11.5 and Microsoft Excel. Normalisation method employed is Percentile Shift Normalization. List of genes that are differentially regulated upon heat and osmotic shock, including the fold change in their expression under these conditions was obtained from Thusitha S. Gunasekera

et al paper <sup>2</sup> available at [http://www.med.wright.edu/bmb/op/papers/osmo\\_Temp/](http://www.med.wright.edu/bmb/op/papers/osmo_Temp/). Fold change in the expression of these listed genes, in the presence of different osmolytes w.r.t their expression in LB, was compared with the available data and plotted in the heat map using Genesis software <sup>3</sup>.

**MIC experiment for  $\Delta$ DnaK and  $\Delta$ OtsA strain :** Gm-R Wt and GG mutants were transformed in E.coli K-12 deletion strains and were grown in LB(control) and LB containing 200mM TMAO in presence of different concentration of Gentamicin. Cultures were grown overnight at 37<sup>0</sup>C and the Absorbance at 600nm was measured. Absorbance value of each of the mutant under all conditions was normalised w.r.t. O.D 600 value for growth at sub-mic concentration of gentamicin.

**Screening for the effect of osmolytes on the activity of CcdB Mutants:** CcdB mutant plasmids were obtained as a kind gift from Prof. Raghavan Varadarajan (*Molecular Biophysics Unit, Indian Institute of Science, Bangalore 560 012*) in 96-well format. These mutant plasmids were transformed in *E. coli* K-12 BW25113, transformants were grown in LB-Broth containing Ampicillin(100 $\mu$ g/ml) and 0.5% glucose to repress the expression of CcdB variants and were grown overnight at 37<sup>0</sup>C. For analysing the effect of osmolytes on activity, secondary culture was inoculated in two parallel sets, control and the test plate. Control plate contained Ampicillin(100 $\mu$ g/ml) for selection and Arabinose(0.001%) for inducing expression of the Ccdb mutants. Test plate contained TMAO (200mM)/ Proline(500Mm)/ 10% Glycerol in addition to the constituents present in control plate. Secondary cultures were grown overnight without shaking at 37<sup>0</sup>C. Growth in control and test plates was analysed by measuring absorbance at 600nm in ELISA plate



reader. Absorbance of the blank was subtracted from each well to calculate the growth.

Unlike Gm-R, increase in Ccdb activity inhibits cell growth hence the bc

was calculated as follows.

Activity(A) = (Highest Absorbance Value (corresponding to Inactive mutant)-Absorbance value for each mutant)/Highest Absorbance Value

Typically the highest absorbance value is obtained for an untransformed cell, or cells transformed with an inactive mutant of CcdB.

### **Cloning of DM-MBP, SM-MBP, oxDM-MBP (18, 296) for integration in yeast.**

The DM-MBP, SM-MBP, oxDM-MBP (18,296) in pCH plasmid were PCR amplified using oligonucleotides MBPNheI\_FP and MBPAvrII\_RP. The 1.3-kilobase PCR product obtained was digested with NheI and AvrII and cloned into single copy, pYM-N23 vector<sup>4</sup> downstream of the *GALI* promoter and with a HDEL ER retention signal at C-terminus.

### **Yeast strains, media and growth conditions**

The list of yeast strains used in this study is shown in Table S2.

*S.cerevisiae* was routinely maintained on YPD medium. The YP medium for Galactose induction contained Yeast extract and peptone together with 2% Raffinose & 2% Galactose as carbon source.

### **Yeast DNA isolation and yeast transformation**

Yeast chromosomal DNA was isolated using Real Biotech Cooperation Genomic DNA isolation columns together with Sorbitol buffer and Zymolase. The yeast transformation procedure used was as described by<sup>5</sup>.

### **Construction of Strains**

The genotypes of strains used in all the experiments are listed in Table I and their construction is described below.

The *S.cerevisiae* strain YMJ003 bearing UPRE-GFP-*TEF2pr*-RFP-*MET15-URA3* cassette integrated at *URA3* locus in BY4742 background was a kind gift from Weissman<sup>6</sup>. This strain was used in the present study to integrate a misfolded protein (DM-MBP, SM-MBP, oxDM-MBP 18, 296) expressed under an inducible *GALI* promoter together with a Norceothrycin resistance marker at the *TEF2pr*-RFP-*MET15-URA3* locus as well at the *IRE1* gene locus. Gene disruption /integration was done by PCR based homology recombination method<sup>5</sup>. Disruption at *URA3* locus was confirmed by PCR using MBP specific oligonucleotides MBP\_FOR and MBP\_REV and streaking on minimal media plates lacking Uracil. Disruption at the *IRE1* locus was confirmed by *IRE1* luminal domain specific oligonucleotides IRELD\_FOR and IRELD\_REV.

**Statistical Analysis** : Mann Whitney test was performed using Wilcox program of R statistical analysis package ( <http://www.R-project.org/>).

### **Galactose Induction assay**

The yeast strains disrupted at the *URA3* locus alone, and *URA3*, *IRE1* locus together, were grown in YP 2% Raffinose media, overnight. These cultures were inoculated in the same media and allowed to grow till they reached the exponential phase. Cells were induced with 2% Galactose and grown for 10 hours ( $OD_{600}$  not exceeding 2.0). To address the effect of TMAO on refolding the misfolded forms of MBP, 50mM, 100mM, 200mM, 500mM was added during galactose induction. 2mM DTT was added to cells and incubated for 2 hours in YP-2%Raffinose media alone in presence/absence of 200mM TMAO . Cells were washed with PBS and cells expressing the Green Fluorescent Protein (GFP) were quantitatively determined using FACS.

### **Immunoblot Analysis of *S. Cerevisiae***

Yeast cells corresponding to  $OD_{600}$  of 1.0 were pelleted and resuspended in SDS-PAGE sample loading buffer containing SDS and  $\beta$ -ME. The cell pellet was migrated on 12% SDS-Polyacrylamide gel and transferred onto PVDF membrane using the standard western blot procedure. MBP expression was revealed with MBP specific antibody and chemiluminescence detection. The MBP expression levels were normalized to those of PGK (phosphoglycerate kinase).

### **TMAO estimation in *S. cerevisiae***

*S. cerevisiae* strain yMJ003 was grown at 30°C for 15 hrs in Synthetic Dextrose media with different concentrations of TMAO (50mM, 100mM, 200mM and 500mM). Cells were

harvested and then quickly washed twice with ice cold phosphate buffered saline. Cell pellets were weighed and resuspended in equal volume of water. 12% trichloroacetic acid (TCA) solution was added to the cell suspensions, vortexed and then centrifuged at 10,000g for 5 min at 4°C. TMAO estimation was performed as described previously<sup>7</sup>. Briefly, An aliquote of 100µl of the supernatant obtained for each sample and was used for TMAO estimation. 100µl of 0.1M ferrous sulphate in 0.1M EDTA in acetate buffer (pH7.4) was added to 100µl of TCA extracted supernatant. 300µl of toluene was added to it. The sample was then incubated at 50°C for 5 min. Samples were then allowed to cool at room temperature. 100µl of 45% KOH solution (w/v) was added and vortexed for 5 min. 200µl of toluene phase was taken and added to 650 µl of 0.2% picric acid (in toluene) and about 20mg of sodium sulphate. 200µl of the toluene phase was taken in a 96-well microtiter plate and spectrophotometric measurement was carried out at 410nm on a microplate reader (Tecan Infinite M200). Standard curve for TMAO was obtained by using known concentrations of TMAO which was then used to calculate intracellular TMAO concentrations.

### **Total intracellular carbohydrate estimation**

*E. coli* cells were grown overnight at 37°C in LB without or with 200mM TMAO or 200mM Proline or 10% Glycerol. *S. cerevisiae* was grown similarly as mentioned in TMAO estimation protocol. Both *E. coli* and *S. cerevisiae* cells were pelleted, washed and extracted with TCA as described for TMAO estimaton protocol. 100µl of TCA extracted supernatant was diluted 5-fold with dist. water to 500 µl in a glass test tube and kept on ice. Carbohydrate estimation was performed as described previously<sup>8</sup>. Briefly, 1ml of chilled 75% H<sub>2</sub>SO<sub>4</sub> solution was added and vortexed briefly. 2ml of chilled 0.2% anthron solution (prepared in 75% H<sub>2</sub>SO<sub>4</sub>) was added and vortexed. The samples were then boiled at 100°C for 15 min

followed by cooling to room temperature. 200µl of each sample was taken in a 96-well microtiter plate and absorbance was measured at 578 nm on microplate reader (Tecan Infinite M200). Standard curve was obtained by using known concentrations of trehalose which was then used to calculate intracellular carbohydrate concentrations for each growth condition. Intracellular glucose was estimated by peroxidise based assay using Roche diagnostic kit and subtracted from the estimated total-carbohydrate obtained from Antrone-assay to obtain the concentration of trehalose.

Table 1: Growth of different Glycine-duplet substitution mutants in presence of different osmolytes

| Residues Mutated |          | Growth(normalized w.r.t WtGmR) |         |             |             |         |
|------------------|----------|--------------------------------|---------|-------------|-------------|---------|
| Residue1         | Residue2 | LB                             | LB+TMAO | LB+Proline  | LB+Glycerol | LB 30DC |
| 5                | 6        | 0.258801731                    | 0.8452  | 0.315605908 | 0.271817856 | 0       |
| 7                | 8        | 0                              | 0       | 0           | 0           | 0       |
| 9                | 10       | 0                              | 0       | 0           | 0           | 0       |
| 11               | 12       | 0                              | 0       | 0           | 0           | 0       |
| 13               | 14       | 0                              | 0       | 0           | 0           | 0       |
| 15               | 16       | 0                              | 0       | 0           | 0           | 0       |
| 17               | 18       | 0                              | 0       | 0           | 0           | 0       |
| 19               | 20       | 0                              | 0       | 0           | 0           | 0       |
| 21               | 22       | 0.391599737                    | 0.9375  | 0           | 0.257330116 | 0       |
| 23               | 24       | 0                              | 0.744   | 0           | 0           | 0.811   |
| 25               | 26       | 0                              | 1.0627  | 0           | 0           | 0       |
| 27               | 28       | 0                              | 0.2764  | 0           | 0           | 0.8516  |
| 29               | 30       | 0                              | 0       | 0           | 0           | 1.013   |
| 31               | 32       | 0                              | 0       | 0           | 0           | 0       |
| 33               | 34       | 0                              | 0       | 0           | 0           | 0       |
| 35               | 36       | 0                              | 0       | 0           | 0           | 0       |
| 37               | 38       | 0                              | 0.768   | 0           | 0           | 0       |
| 39               | 40       | 0                              | 0       | 0           | 0           | 0.4299  |
| 41               | 42       | 0                              | 0.214   | 0           | 0           | 0       |
| 43               | 44       | 0                              | 0       | 0.286835237 | 0           | 0.3594  |
| 45               | 46       | 0                              | 0       | 0           | 0           | 0.2902  |
| 47               | 48       | 0                              | 0       | 0           | 0           | 0       |
| 49               | 50       | 0                              | 0       | 0           | 0           | 0       |
| 51               | 52       | 0                              | 0       | 0           | 0           | 0       |
| 53               | 54       | 0                              | 0.2545  | 0           | 0           | 0       |
| 55               | 56       | 0                              | 0.6984  | 0.34699215  | 0.375991725 | 0       |
| 57               | 58       | 0.230389107                    | 0       | 0           | 0           | 0       |
| 59               | 60       | 0.479308208                    | 0.9337  | 0.788142905 | 0.40703687  | 1.0442  |
| 61               | 62       | 0                              | 0.2322  | 0           | 0           | 0.8381  |
| 63               | 64       | 0.269302034                    | 0.8207  | 0.535309498 | 0.289755075 | 0       |
| 65               | 66       | 0                              | 0.7188  | 0           | 0           | 0       |
| 67               | 68       | 0                              | 0       | 0           | 0           | 0       |
| 69               | 70       | 0                              | 0       | 0           | 0           | 0       |
| 71               | 72       | 0.29339097                     | 0       | 0           | 0           | 0       |
| 73               | 74       | 0.21371219                     | 0.7268  | 0           | 0           | 0       |
| 75               | 76       | 0.240271782                    | 0       | 0           | 0           | 0.4231  |
| 77               | 78       | 0                              | 0       | 0           | 0           | 0       |
| 79               | 80       | 0                              | 0       | 0           | 0           | 0       |
| 81               | 82       | 0                              | 0       | 0           | 0           | 0       |
| 83               | 84       | 0                              | 0       | 0           | 0           | 0       |

|     |     |             |        |             |             |        |
|-----|-----|-------------|--------|-------------|-------------|--------|
| 85  | 86  | 0.209388503 | 0.8241 | 0.551874468 | 0.330458785 | 0      |
| 87  | 88  | 0           | 0      | 0           | 0           | 0      |
| 89  | 90  | 1.030265555 | 0.7473 | 1.04533564  | 0.565022375 | 0.7215 |
| 91  | 92  | 0.383570096 | 0      | 0           | 0           | 0.2631 |
| 93  | 94  | 0           | 0      | 0           | 0           | 0      |
| 95  | 96  | 0           | 0      | 0           | 0           | 0      |
| 97  | 98  | 0           | 0      | 0           | 0           | 0      |
| 99  | 100 | 0.229153802 | 0      | 0           | 0           | 0      |
| 101 | 102 | 0           | 0      | 0           | 0           | 0      |
| 103 | 104 | 0.288449655 | 0      | 0           | 0           | 0      |
| 105 | 106 | 0.375540448 | 0      | 0           | 0           | 0      |
| 107 | 108 | 0.396541053 | 0      | 0           | 0           | 0      |
| 109 | 110 | 0           | 0      | 0.414995611 | 0           | 0      |
| 111 | 112 | 0.2359481   | 0      | 0           | 0           | 0      |
| 113 | 114 | 0           | 0      | 0           | 0           | 0.811  |
| 115 | 116 | 0           | 0      | 0.367044469 | 0           | 0      |
| 117 | 118 | 0           | 0      | 0           | 0           | 0      |
| 119 | 120 | 0           | 0      | 0           | 0           | 0      |
| 121 | 122 | 0.420012361 | 0.7408 | 0.695727971 | 0.356674699 | 0      |
| 123 | 124 | 0           | 0.2619 | 0           | 0           | 0      |
| 125 | 126 | 0           | 0      | 0           | 0           | 0      |
| 127 | 128 | 0           | 0      | 0           | 0           | 0      |
| 129 | 130 | 0           | 0      | 0           | 0           | 0.5085 |
| 131 | 132 | 0           | 0      | 0           | 0           | 0      |
| 133 | 134 | 0           | 0      | 0           | 0           | 0      |
| 135 | 136 | 0           | 0.7289 | 0           | 0.249741265 | 0      |
| 137 | 138 | 0           | 0.6959 | 0           | 0.272507763 | 0      |
| 139 | 140 | 0           | 0      | 0           | 0           | 1.1188 |
| 141 | 142 | 0           | 0      | 0           | 0           | 0      |
| 143 | 144 | 0           | 0      | 0           | 0           | 0      |
| 145 | 146 | 0           | 0      | 0           | 0           | 0      |
| 147 | 148 | 0           | 0      | 0           | 0           | 0      |
| 149 | 150 | 0           | 0      | 0           | 0           | 0      |
| 151 | 152 | 0           | 0      | 0           | 0           | 0      |
| 153 | 154 | 0           | 0      | 0           | 0           | 0      |
| 155 | 156 | 0           | 0      | 0           | 0           | 0.4231 |
| 157 | 158 | 0           | 0      | 0           | 0           | 0      |
| 159 | 160 | 0.282272991 | 0      | 0           | 0           | 0      |
| 161 | 162 | 0.26744905  | 0.7511 | 0           | 0           | 0      |
| 163 | 164 | 0           | 0      | 0           | 0           | 0      |
| 165 | 166 | 0           | 0      | 0           | 0           | 0      |
| 167 | 168 | 0           | 0      | 0           | 0           | 0      |
| 169 | 170 | 0           | 0      | 0           | 0           | 0      |
| 171 | 172 | 0           | 0      | 0           | 0           | 0      |

|     |     |   |   |   |   |   |
|-----|-----|---|---|---|---|---|
| 173 | 174 | 0 | 0 | 0 | 0 | 0 |
| 175 | 176 | 0 | 0 | 0 | 0 | 0 |



Table 2: Activity of CcdB mutants

| Clone no. | Activity    |             |             |             |
|-----------|-------------|-------------|-------------|-------------|
|           | LB          | LB+TMAO     | LB+Proline  | LB+Glycerol |
| 1         | LB          |             |             |             |
| 2         | 0           | 0           | 0.000370459 | 0.087904663 |
| 3         | 0           | 0.036118094 | 0.012812596 | 0.076027159 |
| 4         | 0           | 0.158181179 | 0.130278587 | 0.122388916 |
| 5         | 0.014566671 | 0.039572881 | 0           | 0.089615033 |
| 6         | 0.015686272 | 0.099494814 | 0.116352231 | 0.158000097 |
| 7         | 0.04248607  | 0.099560259 | 0.031953375 | 0.063086337 |
| 8         | 0.043106018 | 0.016660854 | 0           | 0.039863727 |
| 9         | 0.043137222 | 0.03575595  | 0.151841893 | 0.158901664 |
| 10        | 0.043137222 | 0.2697241   | 0.111859791 | 0.115627317 |
| 11        | 0.045172735 | 0.03193338  | 0.327899203 | 0.115843299 |
| 12        | 0.053092007 | 0.109988405 | 0.157681929 | 0.182341929 |
| 13        | 0.059125201 | 0.238243327 | 0           | 0.14177221  |
| 14        | 0.060331768 | 0.095608234 | 0.113656763 | 0.091285485 |
| 15        | 0.066666674 | 0.139525828 | 0.168912895 | 0.127798232 |
| 16        | 0.069677162 | 0.09830405  | 0.04250032  | 0.089291458 |
| 17        | 0.070891034 | 0.065012589 | 0.017890784 | 0.141701701 |
| 18        | 0.072096541 | 0.107656458 | 0.219227341 | 0.210740735 |
| 19        | 0.073906435 | 0.049747407 | 0.109164459 | 0.146279964 |
| 20        | 0.075503773 | 0.08825372  | 0           | 0.11549658  |
| 21        | 0.078129735 | 0.336572109 | 0.219227341 | 0.209388389 |
| 22        | 0.079336303 | 0.109599687 | 0.17250678  | 0.110218    |
| 23        | 0.082352945 | 0.090944453 | 0.128930788 | 0.122839695 |
| 24        | 0.085972825 | 0.067625323 | 0.056603795 | 0.020063119 |
| 25        | 0.085972825 | 0.424795959 | 0.162623546 | 0.059280558 |
| 26        | 0.089827627 | 0.086997511 | 0.074922303 | 0.082174095 |
| 27        | 0.09104157  | 0.125628117 | 0.106563196 | 0.143319281 |
| 28        | 0.091101072 | 0.171006601 | 0.117250717 | 0.078663853 |
| 29        | 0.09419762  | 0.137248777 | 0.107344466 | 0.120349414 |
| 30        | 0.095168746 | 0.065954768 | 0.083516138 | 0.075056632 |
| 31        | 0.095654311 | 0.064698468 | 0.142891524 | 0.036234264 |
| 32        | 0.096625435 | 0           | 0           | 0.070203801 |
| 33        | 0.098567615 | 0.109296462 | 0.168672962 | 0.098997123 |
| 34        | 0.098642544 | 0.214146938 | 0.113656763 | 0           |
| 35        | 0.100024303 | 0.1350502   | 0.180391749 | 0.045616354 |
| 36        | 0.100267122 | 0.118718547 | 0.190157428 | 0.10449691  |
| 37        | 0.104977356 | 0.198989511 | 0.217430364 | 0.258973616 |
| 38        | 0.105278976 | 0.052467955 | 0.078167101 | 0           |
| 39        | 0.106822041 | 0.138190957 | 0.171407342 | 0.085085774 |
| 40        | 0.107064859 | 0.202889422 | 0.002265651 | 0.092203141 |
| 41        | 0.107088961 | 0.007773043 | 0.111410613 | 0.25762127  |
| 42        | 0.108295618 | 1           | 0.07187782  | 0           |

|    |             |             |             |             |
|----|-------------|-------------|-------------|-------------|
| 43 | 0.109735417 | 0.137562806 | 0.13820403  | 0.076027159 |
| 44 | 0.11094929  | 0.113065278 | 0.106172564 | 0.07311548  |
| 45 | 0.111915501 | 0.109599687 | 0.120395357 | 0.245901137 |
| 46 | 0.113374651 | 0.105866    | 0.367543524 | 0.128790505 |
| 47 | 0.117504281 | 0.126256267 | 0.217891979 | 0.070527373 |
| 48 | 0.117803379 | 0.187087825 | 0.135235246 | 0.081771784 |
| 49 | 0.120165304 | 0.08989936  | 0.116709884 | 0.081090339 |
| 50 | 0.121266955 | 0.097940181 | 0.19991019  | 0.264382932 |
| 51 | 0.122602584 | 0.392902021 | 0           | 0           |
| 52 | 0.12488924  | 0.128080571 | 0.238236393 | 0.014991533 |
| 53 | 0.127700957 | 0.065012589 | 0.162032299 | 0.112908475 |
| 54 | 0.130128702 | 0.105841678 | 0.088203745 | 0.152377893 |
| 55 | 0.131342571 | 0.144472376 | 0.135078959 | 0.09285019  |
| 56 | 0.131523359 | 0.184998058 | 0.066487025 | 0.09534246  |
| 57 | 0.134238294 | 0           | 0.191823932 | 0.310361904 |
| 58 | 0.136048279 | 0.082394095 | 0.268194056 | 0.255818208 |
| 59 | 0.136651606 | 0.111542921 | 0.122641507 | 0.214346922 |
| 60 | 0.137858174 | 0.195491649 | 0.181042279 | 0.221108522 |
| 61 | 0.138763211 | 0.144578323 | 0.157681929 | 0           |
| 62 | 0.139839816 | 0.119032668 | 0.124532073 | 0.15723063  |
| 63 | 0.152464234 | 0.158605548 | 0.108125674 | 0.133937285 |
| 64 | 0.15270698  | 0.161746211 | 0.16554795  | 0.096732494 |
| 65 | 0.153544445 | 0.158181179 | 0.181042279 | 0.203979136 |
| 66 | 0.153544445 | 0.048192774 | 0.060197748 | 0           |
| 67 | 0.15659141  | 0.102701016 | 0.129610199 | 0.169200924 |
| 68 | 0.161689786 | 0.161432182 | 0.074141154 | 0.128760879 |
| 69 | 0.164117528 | 0.146670859 | 0.083125561 | 0.130054981 |
| 70 | 0.166817492 | 0.10104933  | 0.255166249 | 0.357693222 |
| 71 | 0.168001958 | 0.219535154 | 0.244845323 | 0.064704014 |
| 72 | 0.169230714 | 0.125534374 | 0.346810465 | 0.364004037 |
| 73 | 0.170135752 | 0.301204815 | 0.145103371 | 0.121487417 |
| 74 | 0.17334308  | 0.155464792 | 0.264376675 | 0.079262413 |
| 75 | 0.173828642 | 0.230527613 | 0.297970619 | 0.132643186 |
| 76 | 0.174785913 | 0.163832032 | 0.170803968 | 0.034412289 |
| 77 | 0.179509852 | 0.160361008 | 0.1674694   | 0           |
| 78 | 0.179788829 | 0.467547638 | 0.34636122  | 0.236885629 |
| 79 | 0.184615366 | 0.327244492 | 0.16172506  | 0           |
| 80 | 0.186123643 | 0.176447696 | 0.125786148 | 0.117881162 |
| 81 | 0.188152497 | 0.14038944  | 0.191329329 | 0.123584571 |
| 82 | 0.189609185 | 0.161118061 | 0.132344579 | 0.109026169 |
| 83 | 0.192795949 | 0.298160385 | 0.303445727 | 0.109028976 |
| 84 | 0.193008054 | 0.130339207 | 0.206563827 | 0.152054321 |
| 85 | 0.1954751   | 0.129420954 | 0.247079991 | 0.28917548  |
| 86 | 0.196078428 | 0.1923825   | 0.303234541 | 0.260325962 |
| 87 | 0.197815181 | 0.283582075 | 0.257873296 | 0.126405507 |

|     |             |             |             |             |
|-----|-------------|-------------|-------------|-------------|
| 88  | 0.198700891 | 0.137452272 | 0.290477965 | 0.073594574 |
| 89  | 0.199320226 | 0.277010063 | 0.245626531 | 0.158201254 |
| 90  | 0.202233606 | 0.310615554 | 0.382736753 | 0.141054651 |
| 91  | 0.206636452 | 0.266226238 | 0.211141083 | 0.262129024 |
| 92  | 0.207239779 | 0.222697241 | 0.293800556 | 0.145829181 |
| 93  | 0.209034564 | 0.163832032 | 0.094479435 | 0.157069861 |
| 94  | 0.211459085 | 0.179020046 | 0.141329045 | 0.130378556 |
| 95  | 0.213401335 | 0.143530102 | 0.174532357 | 0.148495589 |
| 96  | 0.2189852   | 0.26853016  | 0.323361426 | 0.14623096  |
| 97  | 0.222626887 | 0.235552776 | 0.242501515 | 0.133290235 |
| 98  | 0.228657626 | 0.248736918 | 0.376010784 | 0.264382932 |
| 99  | 0.236500715 | 0.193937074 | 0.181940698 | 0.27249681  |
| 100 | 0.23921565  | 0.095608234 | 0.208894866 | 0           |
| 101 | 0.241327255 | 0.181111595 | 0.18733156  | 0           |
| 102 | 0.242232293 | 0.40730664  | 0.349056615 | 0           |
| 103 | 0.246455502 | 0.15856978  | 0.311769976 | 0.14943544  |
| 104 | 0.247360449 | 0.092499085 | 0.28706203  | 0           |
| 105 | 0.248868724 | 0.337738083 | 0.153638802 | 0.280610755 |
| 106 | 0.252974029 | 0.160804032 | 0.19406371  | 0.13458424  |
| 107 | 0.257918561 | 0.330353699 | 0.325247092 | 0.309460341 |
| 108 | 0.258220181 | 0.160901727 | 0.178346816 | 0.17512955  |
| 109 | 0.259043456 | 0.225502497 | 0.372580443 | 0.089615033 |
| 110 | 0.259728459 | 0.219199379 | 0.334231836 | 0.317123503 |
| 111 | 0.263046718 | 0.067625323 | 0.238993738 | 0.211191514 |
| 112 | 0.270454006 | 0.307160814 | 0.208126301 | 0.11549658  |
| 113 | 0.270939568 | 0.27104272  | 0.29640814  | 0.188288585 |
| 114 | 0.271794848 | 0.144189726 | 0.295597528 | 0           |
| 115 | 0.271794848 | 0.310921091 | 0.211141083 | 0.176031117 |
| 116 | 0.272639003 | 0.152010005 | 0.220235783 | 0.153348423 |
| 117 | 0.273906453 | 0.23591138  | 0.345462734 | 0.321631257 |
| 118 | 0.276645976 | 0.182922587 | 0.218599486 | 0.312776839 |
| 119 | 0.279336317 | 0.176447696 | 0.350853592 | 0.477599251 |
| 120 | 0.281369956 | 0.189517526 | 0.270470547 | 0.215672953 |
| 121 | 0.282846171 | 0.188823312 | 0.28566134  | 0.110732533 |
| 122 | 0.284162857 | 0.169840685 | 0.307277672 | 0.051617329 |
| 123 | 0.288687774 | 0.579090562 | 0.384546282 | 0.696675639 |
| 124 | 0.288989394 | 0.48892342  | 0.462264138 | 0.312164966 |
| 125 | 0.296132271 | 0.195418251 | 0.357539815 | 0.109028976 |
| 126 | 0.301741961 | 0.311350214 | 0.333086288 | 0.184327107 |
| 127 | 0.314932158 | 0.273610563 | 0.292902066 | 0.148083094 |
| 128 | 0.315913771 | 0.249913211 | 0.303075216 | 0.103918209 |
| 129 | 0.316338945 | 0.252512538 | 0.319845779 | 0.174377233 |
| 130 | 0.320708938 | 0.278894473 | 0.364767937 | 0.278550619 |
| 131 | 0.323981904 | 0.113486267 | 0.319407056 | 0.063788245 |
| 132 | 0.325791802 | 0.184998058 | 0.186433069 | 0.137264524 |

|     |             |             |             |             |
|-----|-------------|-------------|-------------|-------------|
| 133 | 0.328477801 | 0.281721106 | 0.33664275  | 0.114202574 |
| 134 | 0.329495121 | 0.233599466 | 0.457947365 | 0.319591162 |
| 135 | 0.330920049 | 0.178002329 | 0.372866143 | 0.203528353 |
| 136 | 0.336953244 | 0.254566673 | 0.311320799 | 0.09534246  |
| 137 | 0.341009756 | 0.387018426 | 0.419414585 | 0.267802393 |
| 138 | 0.342485968 | 0.451926401 | 0.015561253 | 0.181942109 |
| 139 | 0.3502262   | 0.40536341  | 0.529200341 | 0.194062066 |
| 140 | 0.352270024 | 0.30841707  | 0.47062796  | 0.215464233 |
| 141 | 0.355656065 | 0.251068807 | 0.340521117 | 0.256719707 |
| 142 | 0.355911636 | 0.421482392 | 0.314767595 | 0.166289245 |
| 143 | 0.368627404 | 0.228138395 | 0.426774471 | 0           |
| 144 | 0.377029827 | 0.320721964 | 0.277880658 | 0.111073303 |
| 145 | 0.377325077 | 0.290524123 | 0.330492745 | 0.191141431 |
| 146 | 0.384410982 | 0.397431445 | 0.319007036 | 0.251448077 |
| 147 | 0.393563604 | 0.269698032 | 0.373471639 | 0.294037473 |
| 148 | 0.400059048 | 0.365151008 | 0.33530937  | 0.244974475 |
| 149 | 0.404826527 | 0.460940572 | 0.495507651 | 0.275652286 |
| 150 | 0.408621212 | 0.251648747 | 0.310114868 | 0.130153391 |
| 151 | 0.408916421 | 0.287400208 | 0.246758046 | 0.410221494 |
| 152 | 0.40921167  | 0.287053099 | 0.314931437 | 0.314480447 |
| 153 | 0.451282057 | 0.424018645 | 0.905211152 | 0.958575622 |
| 154 | 0.460030138 | 0.310921091 | 1           | 0.99103139  |
| 155 | 0.469441972 | 0.348837211 | 0.340496454 | 0.418398652 |
| 156 | 0.498376138 | 0.523429371 | 0.315672467 | 0.276320274 |
| 157 | 0.506052545 | 0.473099601 | 0.236013306 | 0.343441243 |
| 158 | 0.538234435 | 0.493925748 | 0.041126322 | 0.071891017 |
| 159 | 0.54871794  | 0.465993009 | 0.646451053 | 0.746711617 |
| 160 | 0.55294115  | 0.590361468 | 0.658580437 | 0.828752585 |
| 161 | 0.557767732 | 0.408861272 | 0.547169828 | 0.455060481 |
| 162 | 0.571945681 | 0.350174907 | 0.533243468 | 0.199922166 |
| 163 | 0.58883861  | 0.543334667 | 0.678796079 | 0.8476851   |
| 164 | 0.600603289 | 0.691799457 | 0.693620859 | 0.54521543  |
| 165 | 0.61647477  | 0.49461991  | 0.416821043 | 0.679386725 |
| 166 | 0.635595757 | 0.612125906 | 0.747529223 | 0.859405232 |
| 167 | 0.654298623 | 0.670812275 | 0.85579516  | 0.816581669 |
| 168 | 0.814585182 | 0.848663661 | 0.828825487 | 0.847700173 |
| 169 | 0.830823733 | 0.851440467 | 0.835124113 | 0.855536633 |
| 170 | 0.838500152 | 0.812217986 | 0.795109291 | 0.82453152  |
| 171 | 0.841747863 | 0.838250613 | 0.840311227 | 0.850766613 |
| 172 | 0.845881306 | 0.836515101 | 0.824749903 | 0.838160143 |
| 173 | 0.847062292 | 0.834432494 | 0.82734346  | 0.841567291 |
| 174 | 0.84942427  | 0.833044091 | 0.806224527 | 0.81873936  |
| 175 | 0.84942427  | 0.848663661 | 0.824749903 | 0.82555367  |
| 176 | 0.850605254 | 0.839639016 | 0.828825487 | 0.841908013 |
| 177 | 0.85178624  | 0.837903505 | 0.824379392 | 0.840204433 |

|     |             |             |             |             |
|-----|-------------|-------------|-------------|-------------|
| 178 | 0.853852966 | 0.803887545 | 0.817710266 | 0.833390119 |
| 179 | 0.855919694 | 0.836515101 | 0.82104482  | 0.841567291 |
| 180 | 0.855919694 | 0.851440467 | 0.824749903 | 0.851107335 |
| 181 | 0.857100677 | 0.838250613 | 0.826602445 | 0.842589441 |
| 182 | 0.857100677 | 0.83755641  | 0.824749903 | 0.839863724 |
| 183 | 0.85769117  | 0.833391186 | 0.802148943 | 0.838160143 |
| 184 | 0.859757899 | 0.850052064 | 0.825861434 | 0.846337311 |
| 185 | 0.859757899 | 0.836167993 | 0.826602445 | 0.840545151 |
| 186 | 0.859757899 | 0.837903505 | 0.826972945 | 0.839863724 |
| 187 | 0.86005314  | 0.838250613 | 0.82215635  | 0.840545151 |
| 188 | 0.86005314  | 0.853870183 | 0.836606143 | 0.852810902 |
| 189 | 0.86064363  | 0.832002779 | 0.815857725 | 0.840204433 |
| 190 | 0.860938882 | 0.84588685  | 0.807706557 | 0.838841571 |
| 191 | 0.861234135 | 0.828531755 | 0.809188584 | 0.833049411 |
| 192 | 0.861529375 | 0.837903505 | 0.828084476 | 0.839863724 |
| 193 | 0.863005611 | 0.851093372 | 0.838458685 | 0.848381601 |
| 194 | 0.863005611 | 0.841374528 | 0.835124113 | 0.849744463 |
| 195 | 0.863073564 | 0.858040196 | 0.87961488  | 0.841151732 |
| 196 | 0.863300852 | 0.84588685  | 0.824749903 | 0.848040892 |
| 197 | 0.864777087 | 0.849704969 | 0.833642086 | 0.848381601 |
| 198 | 0.865072337 | 0.850746267 | 0.819933308 | 0.851448044 |
| 199 | 0.865072337 | 0.829920172 | 0.816228225 | 0.839523002 |
| 200 | 0.865367577 | 0.852134684 | 0.824379392 | 0.851788763 |
| 201 | 0.86595807  | 0.832349874 | 0.82104482  | 0.837819421 |
| 202 | 0.867139054 | 0.820201318 | 0.818451278 | 0.832708692 |
| 203 | 0.867434306 | 0.852828884 | 0.826231934 | 0.84667802  |
| 204 | 0.867434306 | 0.849704969 | 0.826231934 | 0.828620113 |
| 205 | 0.867434306 | 0.847275254 | 0.829195987 | 0.850085182 |
| 206 | 0.867729559 | 0.826796257 | 0.824008892 | 0.838160143 |
| 207 | 0.868320049 | 0.825754949 | 0.816228225 | 0.841226582 |
| 208 | 0.868910542 | 0.832002779 | 0.825120404 | 0.841567291 |
| 209 | 0.869205782 | 0.84380423  | 0.819933308 | 0.835775131 |
| 210 | 0.869796275 | 0.832696983 | 0.82215635  | 0.836797281 |
| 211 | 0.870091525 | 0.852481779 | 0.817339751 | 0.845996593 |
| 212 | 0.870091525 | 0.846928149 | 0.835494628 | 0.852470194 |
| 213 | 0.870091525 | 0.813953498 | 0.828454976 | 0.841226582 |
| 214 | 0.870386766 | 0.851787576 | 0.836235643 | 0.853492333 |
| 215 | 0.871085217 | 0.866206035 | 0.888989934 | 0.837593013 |
| 216 | 0.871272511 | 0.848316566 | 0.828825487 | 0.841908013 |
| 217 | 0.871272511 | 0.852828884 | 0.835494628 | 0.851788763 |
| 218 | 0.871567761 | 0.826102054 | 0.824749903 | 0.839523002 |
| 219 | 0.871863001 | 0.82818466  | 0.813264168 | 0.839182279 |
| 220 | 0.872158254 | 0.850052064 | 0.841052238 | 0.849403754 |
| 221 | 0.872453494 | 0.847275254 | 0.828084476 | 0.841226582 |
| 222 | 0.872453494 | 0.796945511 | 0.831048529 | 0.848040892 |

|     |             |             |             |             |
|-----|-------------|-------------|-------------|-------------|
| 223 | 0.872748747 | 0.836167993 | 0.788440151 | 0.838160143 |
| 224 | 0.872748747 | 0.84033322  | 0.812152641 | 0.849063032 |
| 225 | 0.873339237 | 0.853870183 | 0.835494628 | 0.842248722 |
| 226 | 0.87392973  | 0.847275254 | 0.839199696 | 0.849744463 |
| 227 | 0.874224982 | 0.850052064 | 0.831048529 | 0.848722323 |
| 228 | 0.874241323 | 0.84359296  | 0.885083652 | 0.846651567 |
| 229 | 0.874241323 | 0.86463568  | 0.888599303 | 0.852798451 |
| 230 | 0.874520223 | 0.84588685  | 0.835124113 | 0.852129472 |
| 231 | 0.874726875 | 0.858668334 | 0.8800055   | 0.841798768 |
| 232 | 0.875697992 | 0.864321603 | 0.881177386 | 0.85700421  |
| 233 | 0.875996459 | 0.851440467 | 0.838458685 | 0.851448044 |
| 234 | 0.875996459 | 0.850052064 | 0.833642086 | 0.850766613 |
| 235 | 0.876911874 | 0.867462313 | 0.877271119 | 0.850210286 |
| 236 | 0.87909687  | 0.857726132 | 0.823755157 | 0.843092848 |
| 237 | 0.879339652 | 0.862751261 | 0.889771189 | 0.852151412 |
| 238 | 0.881767421 | 0.865263817 | 0.880396131 | 0.844063411 |
| 239 | 0.881767421 | 0.866206035 | 0.89172433  | 0.854416041 |
| 240 | 0.882010203 | 0.866206035 | 0.889771189 | 0.85700421  |
| 241 | 0.882495755 | 0.861180906 | 0.875708598 | 0.847945656 |
| 242 | 0.882495755 | 0.867776377 | 0.882739892 | 0.84762213  |
| 243 | 0.882738528 | 0.853015077 | 0.883130527 | 0.848592693 |
| 244 | 0.882738528 | 0.865577881 | 0.881958641 | 0.851827888 |
| 245 | 0.884680754 | 0.864007539 | 0.866333539 | 0.850210286 |
| 246 | 0.884923527 | 0.864007539 | 0.889771189 | 0.852798451 |
| 247 | 0.884923527 | 0.866834172 | 0.871021076 | 0.851180849 |
| 248 | 0.885409079 | 0.866206035 | 0.874536723 | 0.854739567 |
| 249 | 0.886622968 | 0.866206035 | 0.890161825 | 0.833387254 |
| 250 | 0.887108523 | 0.854585422 | 0.887818048 | 0.855063094 |
| 251 | 0.887108523 | 0.863065325 | 0.886646174 | 0.853121965 |
| 252 | 0.887836857 | 0.866206035 | 0.889380554 | 0.85700421  |
| 253 | 0.887836857 | 0.865891958 | 0.886255542 | 0.852474925 |
| 254 | 0.88807963  | 0.86149497  | 0.890552444 | 0.855063094 |
| 255 | 0.88807963  | 0.866520099 | 0.885083652 | 0.852474925 |
| 256 | 0.888322412 | 0.863693462 | 0.888989934 | 0.854416041 |
| 257 | 0.888322412 | 0.855527636 | 0.892505585 | 0.853769005 |
| 258 | 0.888565194 | 0.862123108 | 0.894458726 | 0.854739567 |
| 259 | 0.888807967 | 0.865891958 | 0.89211495  | 0.852151412 |
| 260 | 0.888807967 | 0.863693462 | 0.883521146 | 0.852798451 |
| 261 | 0.889050747 | 0.861180906 | 0.890161825 | 0.852151412 |
| 262 | 0.889050747 | 0.862437184 | 0.888599303 | 0.841798768 |
| 263 | 0.889050747 | 0.860866829 | 0.885083652 | 0.857651246 |
| 264 | 0.889050747 | 0.866834172 | 0.866333539 | 0.851180849 |
| 265 | 0.889293519 | 0.867148236 | 0.887427429 | 0.854092528 |
| 266 | 0.889536301 | 0.858040196 | 0.888599303 | 0.848592693 |
| 267 | 0.889779074 | 0.869032655 | 0.89211495  | 0.848592693 |

|     |             |             |             |             |
|-----|-------------|-------------|-------------|-------------|
| 268 | 0.890021856 | 0.839195981 | 0.874536723 | 0.849886772 |
| 269 | 0.890264629 | 0.865263817 | 0.887427429 | 0.855386607 |
| 270 | 0.890264629 | 0.864949744 | 0.887427429 | 0.854739567 |
| 271 | 0.890750181 | 0.865891958 | 0.890552444 | 0.804593977 |
| 272 | 0.892206852 | 0.865891958 | 0.884302401 | 0.853769005 |
| 273 | 0.952941173 | 0.998056739 | 1           | 0.986974429 |
| 274 | 0.963197586 | 0.991061026 | 0.992362979 | 0.976155841 |
| 275 | 0.963499239 | 0.75553829  | 1           | 0.983819003 |
| 276 | 0.98069381  | 0.994558889 | 1           | 0.99103139  |
| 277 | 0.982805427 | 0.996502138 | 1           | 0.99103139  |
| 278 | 0.983107089 | 0.969685201 | 1           | 0.986974429 |
| 279 | 0.984313725 | 0.994947532 | 1           | 0.99103139  |
| 280 | 0.985218694 | 0.999222697 | 1           | 0.99103139  |
| 281 | 0.986425339 | 0.998445398 | 1           | 0.98607288  |
| 282 | 0.986425339 | 1           | 1           | 0.925218318 |
| 283 | 0.987028657 | 0.998834054 | 1           | 0.99103139  |
| 284 | 0.988235291 | 0.996890793 | 1           | 0.98111436  |
| 285 | 0.988536944 | 0.995724835 | 1           | 0.99103139  |
| 286 | 0.996078425 | 0.997668096 | 1           | 0.99103139  |
| 287 | 0.999698341 | 1           | 1           | 0.984269768 |
| 288 | 1           | 0.997668096 | 1           | 0.99103139  |

Table 3: List of Yeast Strains

| Strain                                                                                                                                                                                                                                                                                                                                                                | Ref        |
|-----------------------------------------------------------------------------------------------------------------------------------------------------------------------------------------------------------------------------------------------------------------------------------------------------------------------------------------------------------------------|------------|
| <p>YMJ003<br/> <i>MAT<math>\alpha</math> his3<math>\Delta</math>1 leu2<math>\Delta</math>0 met15<math>\Delta</math>0 ura3<math>\Delta</math>0 LYS+<math>\Delta</math>can1::STE2pr-spHIS5<math>\Delta</math>lyp1::STE3pr-LEU2 cyh2<math>\Delta</math>ura3::UPRE-GFP-TEF2pr-RFP-MET15-URA3</i></p>                                                                      | 6          |
| <p>YNK001 ( <i>URA3</i> disrupted with SM-MBP)<br/> <i>MAT<math>\alpha</math> his3<math>\Delta</math>1 leu2<math>\Delta</math>0 met15<math>\Delta</math>0 ura3<math>\Delta</math>0 LYS+<math>\Delta</math>can1::STE2pr-spHIS5<math>\Delta</math>lyp1::STE3pr-LEU2 cyh2<math>\Delta</math>ura3:: UPRE-GFP-TEF2pr-RFP-MET15-NAT-GAL1pr-erSM-MBP</i></p>                 | This study |
| <p>YNK002 ( <i>URA3</i> disrupted with DM-MBP)<br/> <i>MAT<math>\alpha</math> his3<math>\Delta</math>1 leu2<math>\Delta</math>0 met15<math>\Delta</math>0 ura3<math>\Delta</math>0 LYS+<math>\Delta</math>can1::STE2pr-spHIS5<math>\Delta</math>lyp1::STE3pr-LEU2 cyh2<math>\Delta</math>ura3:: UPRE-GFP-TEF2pr-RFP-MET15-NAT-GAL1pr-erDM-MBP</i></p>                 | This study |
| <p>YNK003 (<i>URA3</i> disrupted with oxDM-MBP 18,296)<br/> <i>MAT<math>\alpha</math> his3<math>\Delta</math>1 leu2<math>\Delta</math>0 met15<math>\Delta</math>0 ura3<math>\Delta</math>0 LYS+<math>\Delta</math>can1::STE2pr-spHIS5<math>\Delta</math>lyp1::STE3pr-LEU2 cyh2<math>\Delta</math>ura3:: UPRE-GFP-TEF2pr-RFP-MET15-NAT-GAL1pr-erDM-MBP(18,296)</i></p> | This study |
| <p>YNK004<br/> YNK002, <i><math>\Delta</math>ire1:KanMx</i></p>                                                                                                                                                                                                                                                                                                       | This study |



## References:

1. Abramoff, M.D., Magelhaes, P.J. & Ram, S.J. Image Processing with ImageJ. *Biophotonics International* **11**, 36-42 (2004).
2. Gunasekera, T.S., Csonka, L.N. & Paliy, O. Genome-wide transcriptional responses of *Escherichia coli* K-12 to continuous osmotic and heat stresses. *J Bacteriol* **190**, 3712-20 (2008).
3. Sturn, A. et al. Client-server environment for high-performance gene expression data analysis. *Bioinformatics* **19**, 772-3 (2003).
4. Janke, C. et al. A versatile toolbox for PCR-based tagging of yeast genes: new fluorescent proteins, more markers and promoter substitution cassettes. *Yeast* **21**, 947-62 (2004).
5. Guldener, U., Heck, S., Fielder, T., Beinhauer, J. & Hegemann, J.H. A new efficient gene disruption cassette for repeated use in budding yeast. *Nucleic Acids Res* **24**, 2519-24 (1996).
6. Jonikas, M.C. et al. Comprehensive characterization of genes required for protein folding in the endoplasmic reticulum. *Science* **323**, 1693-7 (2009).
7. Wekell, J.C. & Barnett, H. New Method for Analysis of Trimethylamine Oxide Using Ferrous Sulfate and EDTA. *Journal of Food Science* **56**, 132-135 (1991).
8. Daniels, L., Hanson, R.S. & Phillips, J.A. Chemical Analysis. in *Methods for General and Molecular Bacteriology* (eds. Gerhardt, P., Murray, R.G.E., Wood, W.A. & Krieg, N.R.) 512-554 (American Society for Microbiology, Washington DC, 1994).

Figure 1

MBP crystal structure (1omp) showing DM-MBP mutations

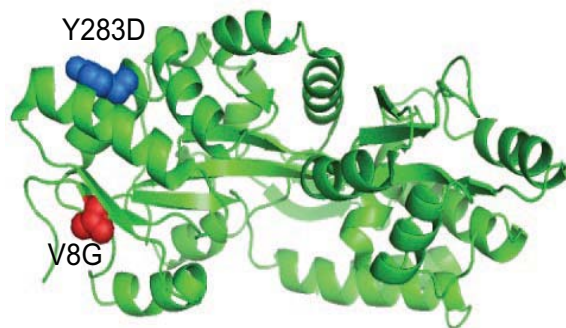

Figure 2

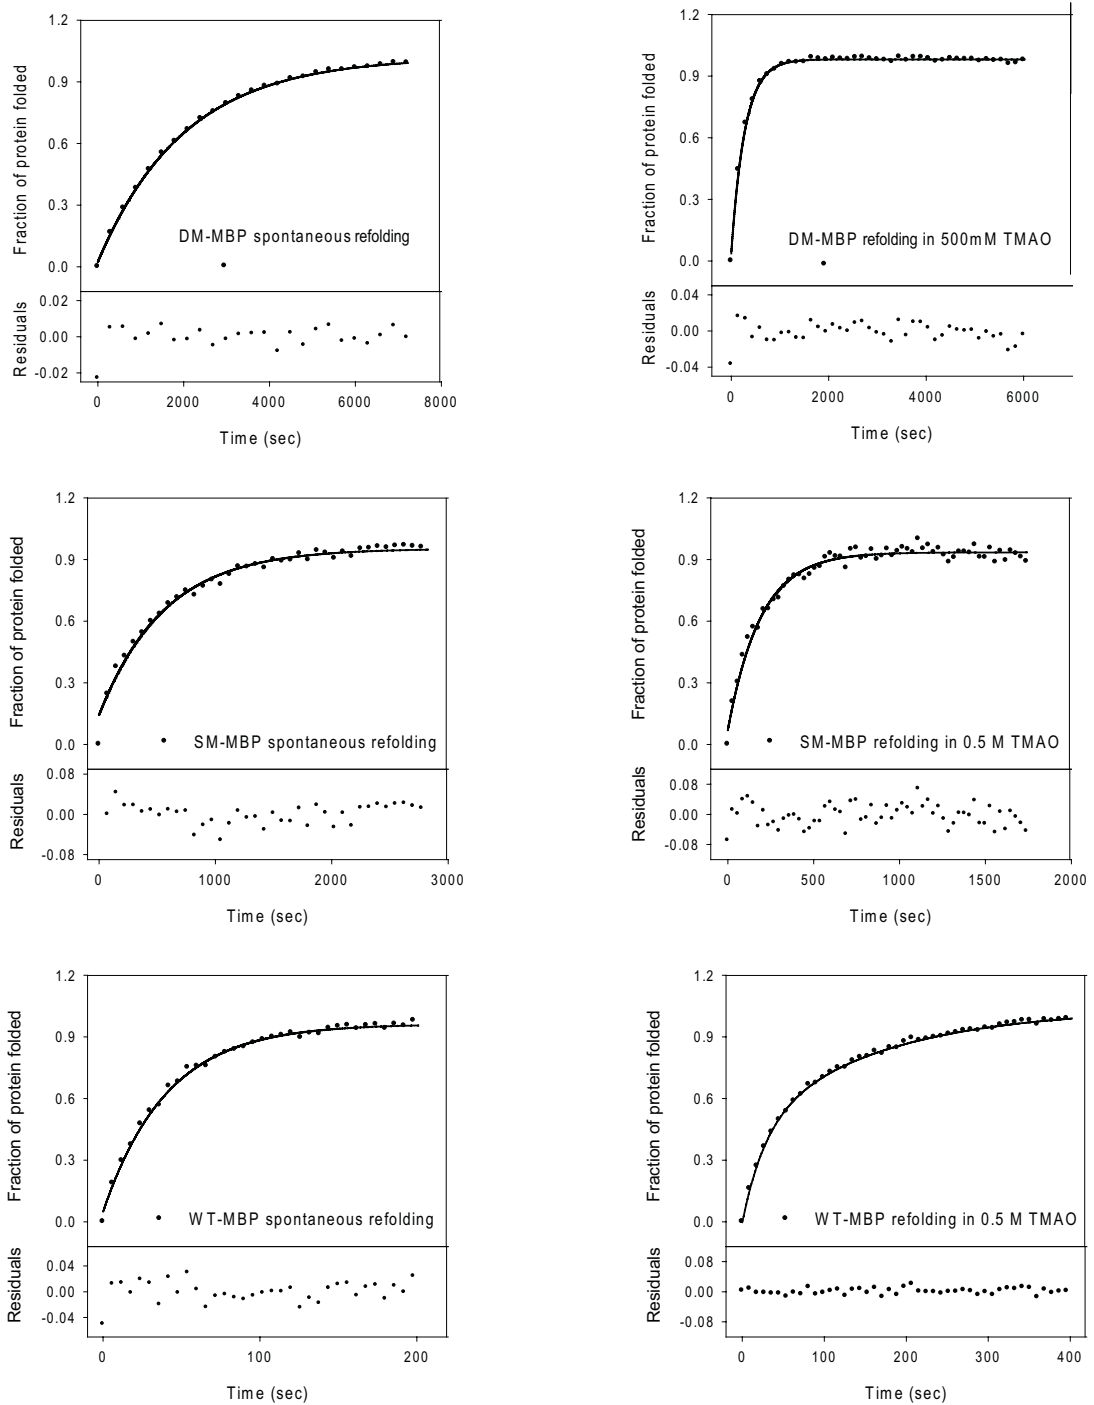

## Figure 2 Legend

Non-linear regression based exponential fitting of folding rates of DM-MBP, SM-MBP and Wt-MBP in presence and absence of TMAO as indicated in the panels. The residuals are plotted to indicate the goodness of fit. The folding of wt-MBP deviates from single exponential behaviour in presence and absence of TMAO. This does not affect the conclusion as there is no obvious acceleration in folding rate afforded by TMAO. Both the spontaneous and the TMAO assisted refolding traces of Wt-MBP can be fit better using a bi-exponential function. Incorporation of 2 rate constants in both the cases does not alter the results. There is no rate acceleration with TMAO. Similarly the unfolding rate of SM-MBP deviates from single-exponential behaviour. But this does not affect the interpretation or conclusion of the section.

Figure 3

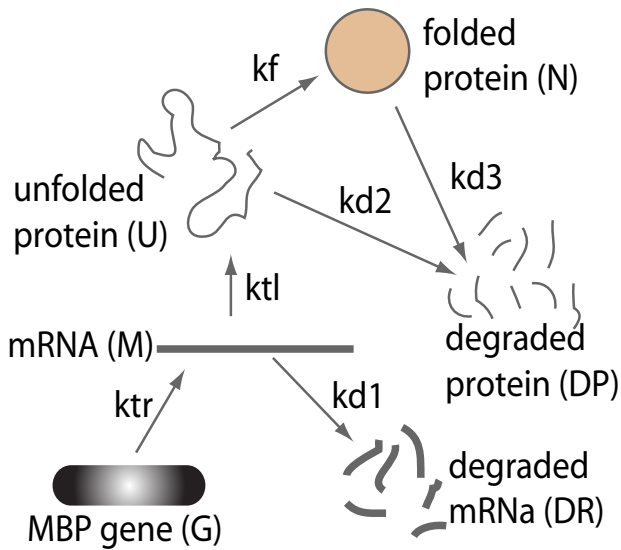

| Parameter | Value    | Unit               |
|-----------|----------|--------------------|
| [G]       | 1        | cell <sup>-1</sup> |
| ktr       | 0.03     | s <sup>-1</sup>    |
| ktl       | 0.01     | s <sup>-1</sup>    |
| kf        | Variable | s <sup>-1</sup>    |
| kd1       | .25      | s <sup>-1</sup>    |
| kd2       | Variable | s <sup>-1</sup>    |
| kd3       | 0.25*kd2 | s <sup>-1</sup>    |

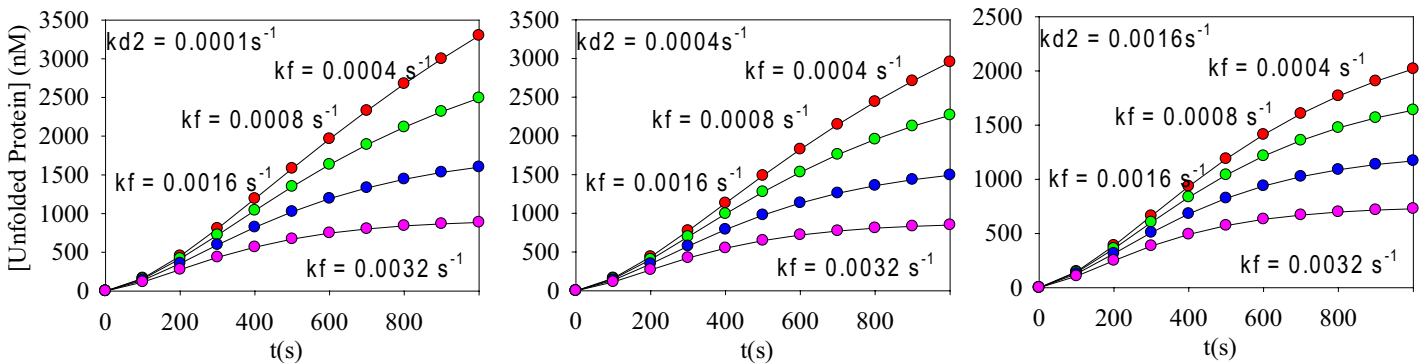

Numerical simulation to observe the effect of folding rate on steady-state concentration of non-native protein. Here the parameters were fixed as described. The rates of transcription and translation were kept fixed as the variants of DM-MBP described here does not exhibit altered expression as seen with western blot. It is also observed that under the various conditions tested, amount of DM-MBP produced did not alter significantly further justifying this assumption. We fixed these values to approximately the time required for transcription (assumed rate is 30 nucleotide/s) and translation (assumed rate is 4 aa/s). The degradation rate of mRNA was fixed at half the value of translation rate. Folding rate was varied from 0.0004s<sup>-1</sup> to 0.1024 s<sup>-1</sup>. Degradation rate was varied from 0.0001 to 0.002 s<sup>-1</sup>. The accumulation of non-native protein with time is shown for different folding rates and for different rates of degradation of the non-native protein.

Figure 4

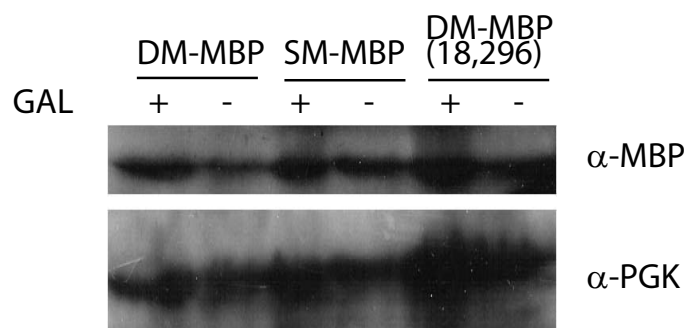

Expression level of DM-MBP, SM-MBP and DM-MBP(18,296) was checked using Western blotting with anti-MBP antibody. The blot was reprobred for PGK to control for the amount of loading.

Figure 5

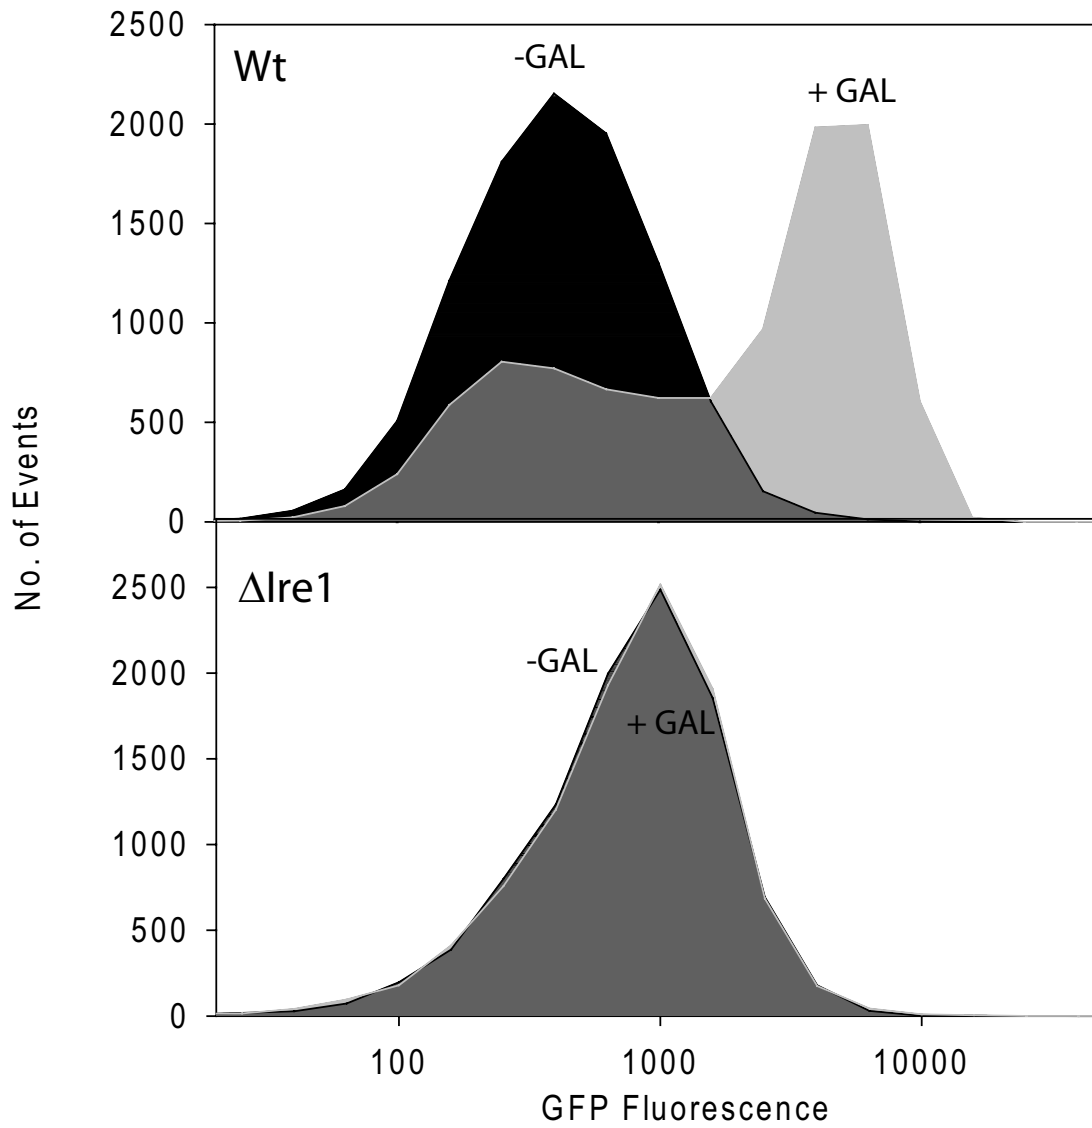

A strain with genome integrated version of DM-MBP targeted to the ER and under the control of GAL-promoter was generated on the background of a strain containing UPRE-GFP and a deletion of IRE1. Cells were grown for induction as described previously and the fluorescence was recorded using a flow cytometer.

Figure 6

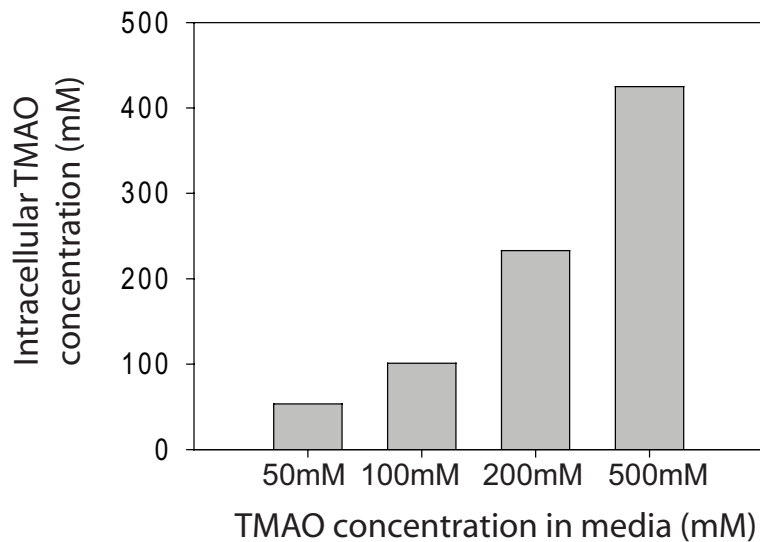

*S. cerevisiae* strain yMJ003 was grown at 30 °C for 15 hrs in Synthetic Dextrose media with different concentrations of TMAO (50mM, 100mM, 200mM and 500mM). Cells were harvested and then quickly washed twice with ice cold phosphate buffered saline. Cell pellets were weighed and resuspended in equal volume of water. 12% trichloroacetic acid (TCA) solution was added to the cell suspensions, vortexed and then centrifuged at 10,000g for 5 min at 4 °C. An aliquote of 100µl of the supernatant obtained for each sample and was used for TMAO estimation. 100µl of 0.1M ferrous sulphate in 0.1M EDTA in acetate buffer (pH7.4) was added to 100µl of TCA extracted supernatant. 300µl of toluene was added to it. The sample was then incubated at 50° C for 5 min. Samples were then allowed to cool at room temperature. 100µl of 45% KOH solution (w/v) was added and vortexed for 5 min. 200µl of toluene phase was taken and added to 650 µl of 0.2% picric acid (in toluene) and about 20mg of sodium sulphate. 200µl of the toluene phase was taken in a 96-well microtiter plate and spectrophotometric measurement was carried out at 410nm on a microplate reader (Tecan Infinite M200). Standard curve for TMAO was obtained by using known concentrations of TMAO which was then used to calculate intracellular TMAO concentrations.



Figure 7

DM-MBP expression levels in *S. cerevisiae*

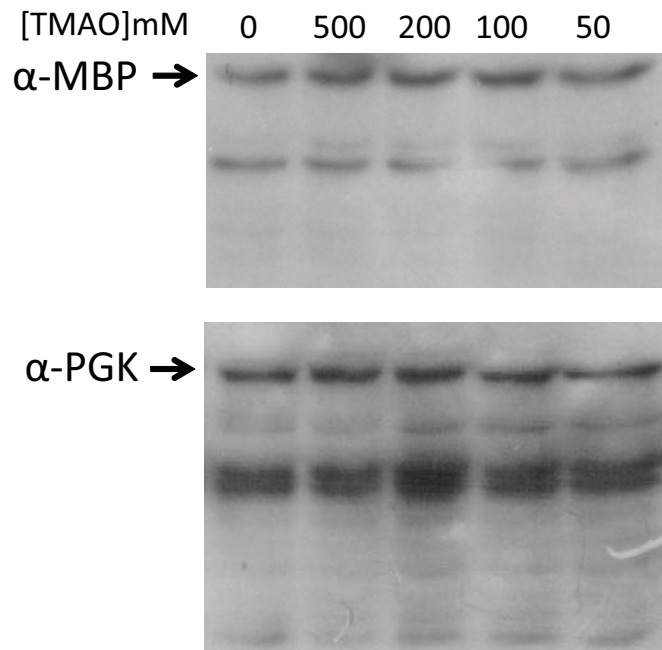

Protein expression level of DM-MBP induced in 2% galactose containing YP media in presence of different concentrations of TMAO was determined by immunoblotting using MBP-specific antibody (upper blot). Lower bands correspond to the degradation product due to ER associated degradation. The expression level of yeast phospho-glycerate kinase was taken as the loading control (lower blot). PGK-band is shown with an arrow, the other bands are cross-reacting species.

Figure 8

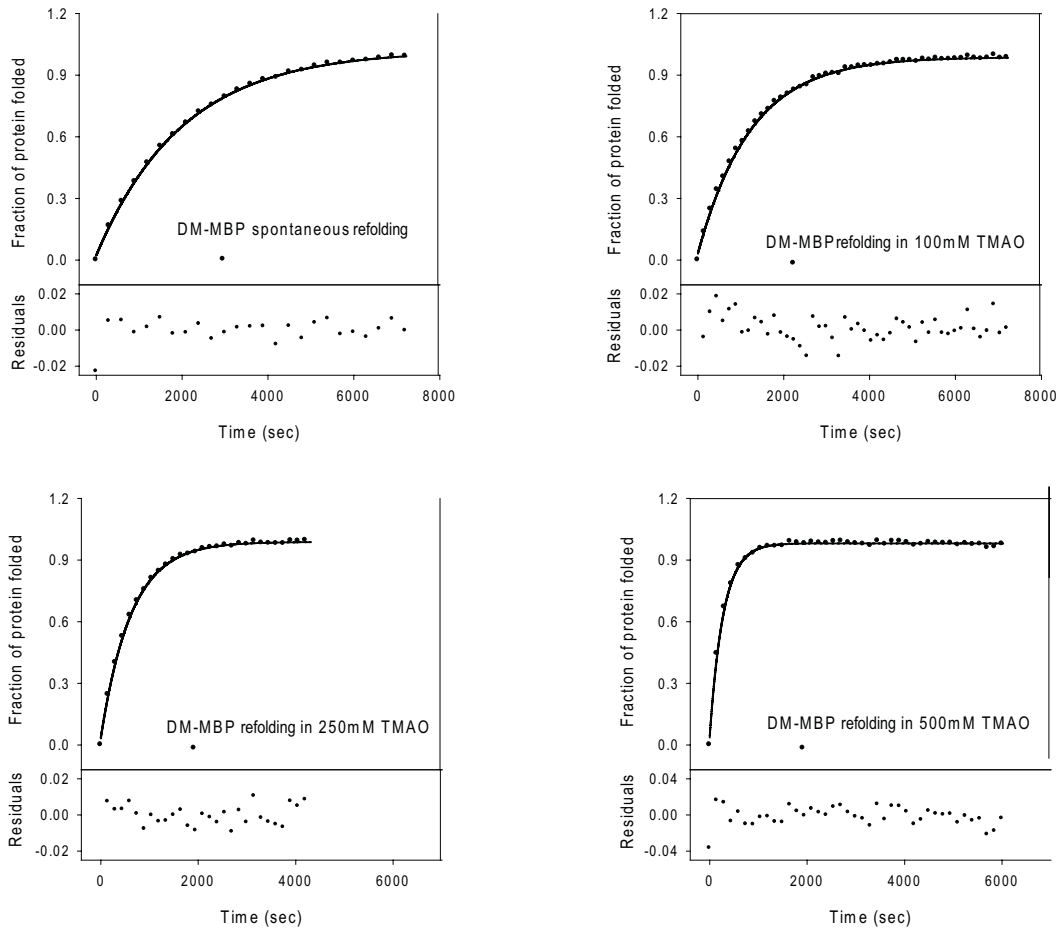

Non-linear regression based exponential fitting of DM-MBP folding rates in presence of different concentrations of TMAO as indicated in the panels. solid lines show the fitted curve. The residuals are plotted to indicate the goodness of fit. Some of the plots could be better fit to double exponential equation yielding better distribution of residuals but the other rate contributed insignificant amplitude to the fitting results. Thus single exponential fitting was deemed more appropriate for analysis.

Fig 9

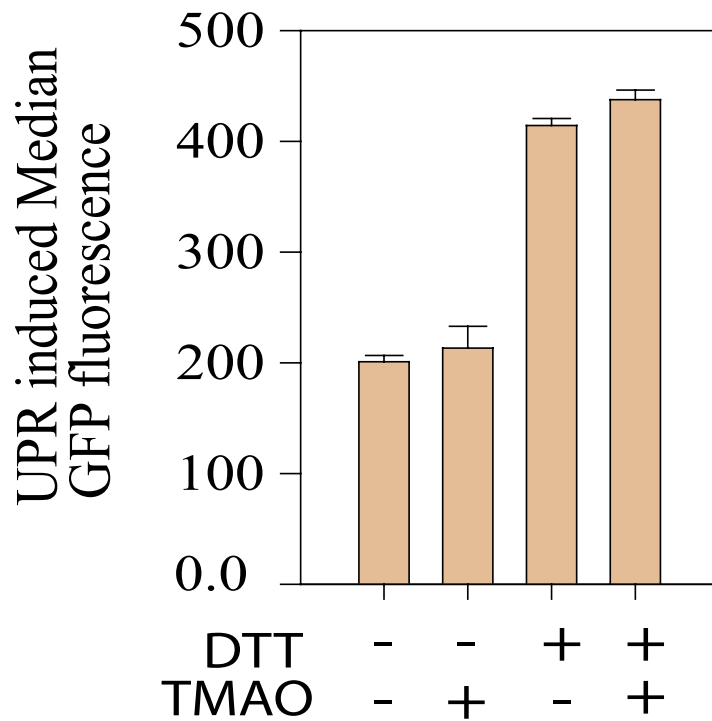

UPR was induced by addition of 5mM of DTT to *S. cereisiae* cells grown till the O.D 600 of 0.5. Fluorescence of GFP expressed under the control of UPRE is read out in a fluorimeter. No decrease in fluorescence upon addition of TMAO to a DTT treated sample rules out the possibility that TMAO affects the general UPR pathway. TMAO alone does not induce any UPR, thus chaperone content of the ER is not altered in presence of TMAO.

Figure 10

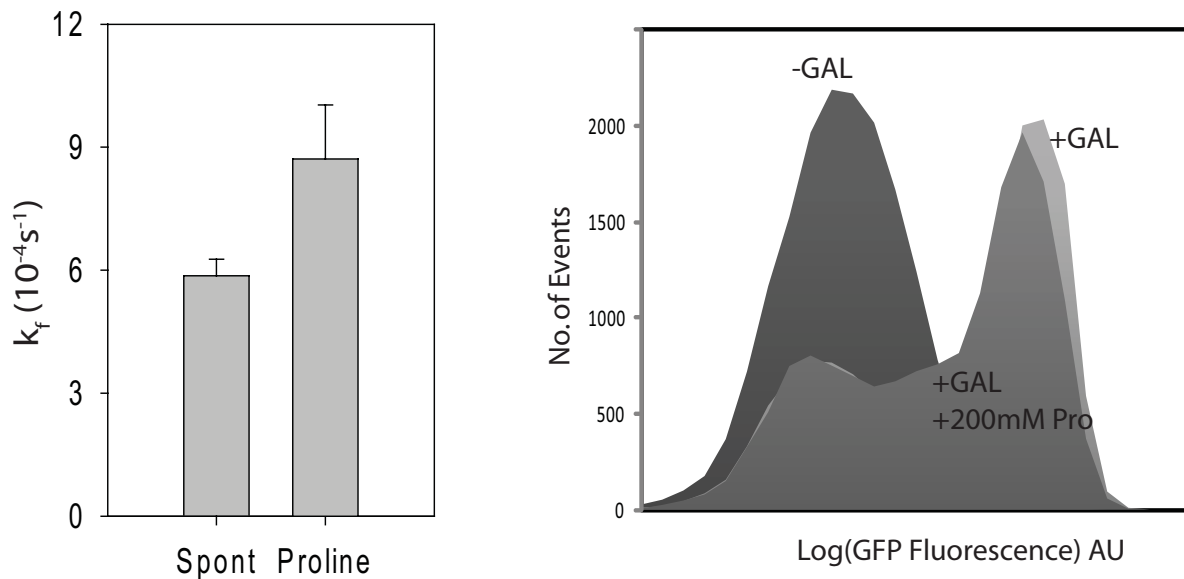

Left Panel: Refolding of DM-MBP was performed as described earlier in the presence of 200mM of Proline in the refolding buffer. Acceleration afforded by Proline is only marginal. Right Panel: Flowcytometric analysis of DM-MBP folding assistance in vivo in presence of Proline. *S. cerevisiae* was grown in 200mM of Proline during induction with Galactose and the decrease in UPR was recorded as the decrease in GFP fluorescence. There is a marginal, but reproducible, decrease of DM-MBP induced UPR in presence of Proline.

Figure 11

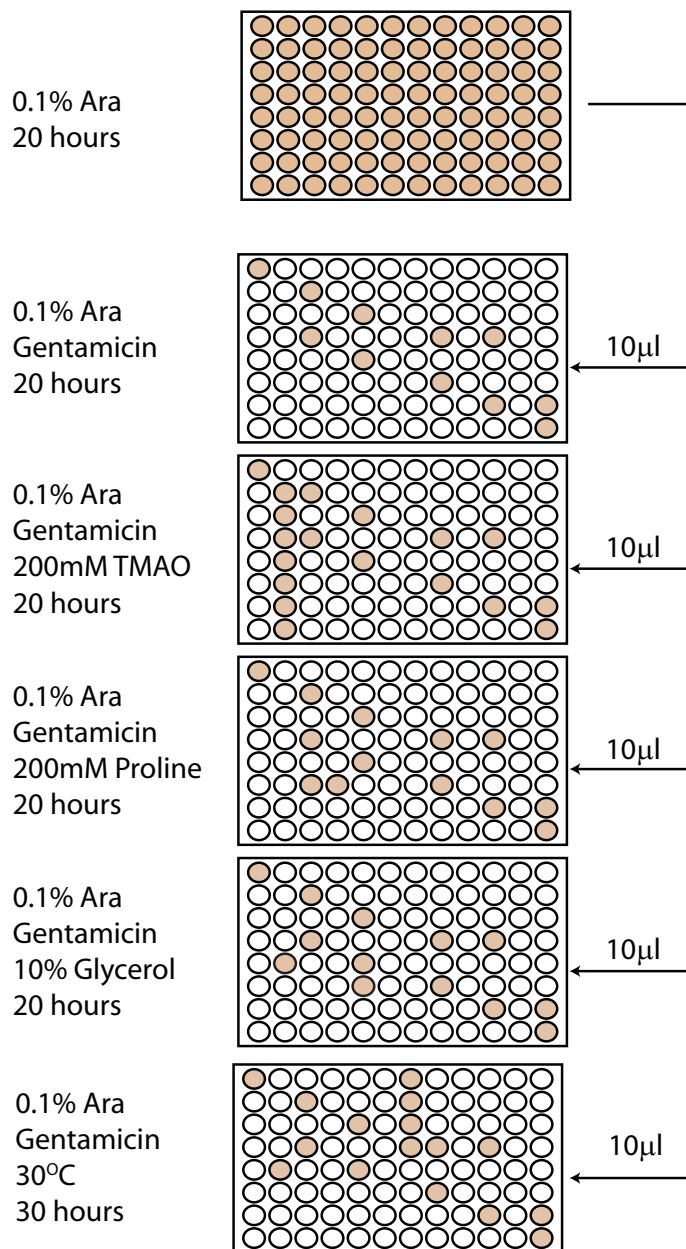

Characterization of Gentamycin glycerine duplet substitution library: Schematic of the screening procedure for obtaining mutations buffered under different conditions. C)  $\Delta\Delta G$  values due to mutations were calculated using FoldX. The  $\Delta\Delta G$  values were calculate for all the mutants made, and the  $\Delta\Delta G$  values for the different subsets are shown. One subset consists of the mutants that are more active in presence of 500mM TMAO than in its absence and the other subset consist of mutants that are more active at 30°C than at 37°C. D) In yellow are shown the residues which when mutated to glycine-duplets lead to proteins that are more active at 30°C than at 37°C.

Figure 12

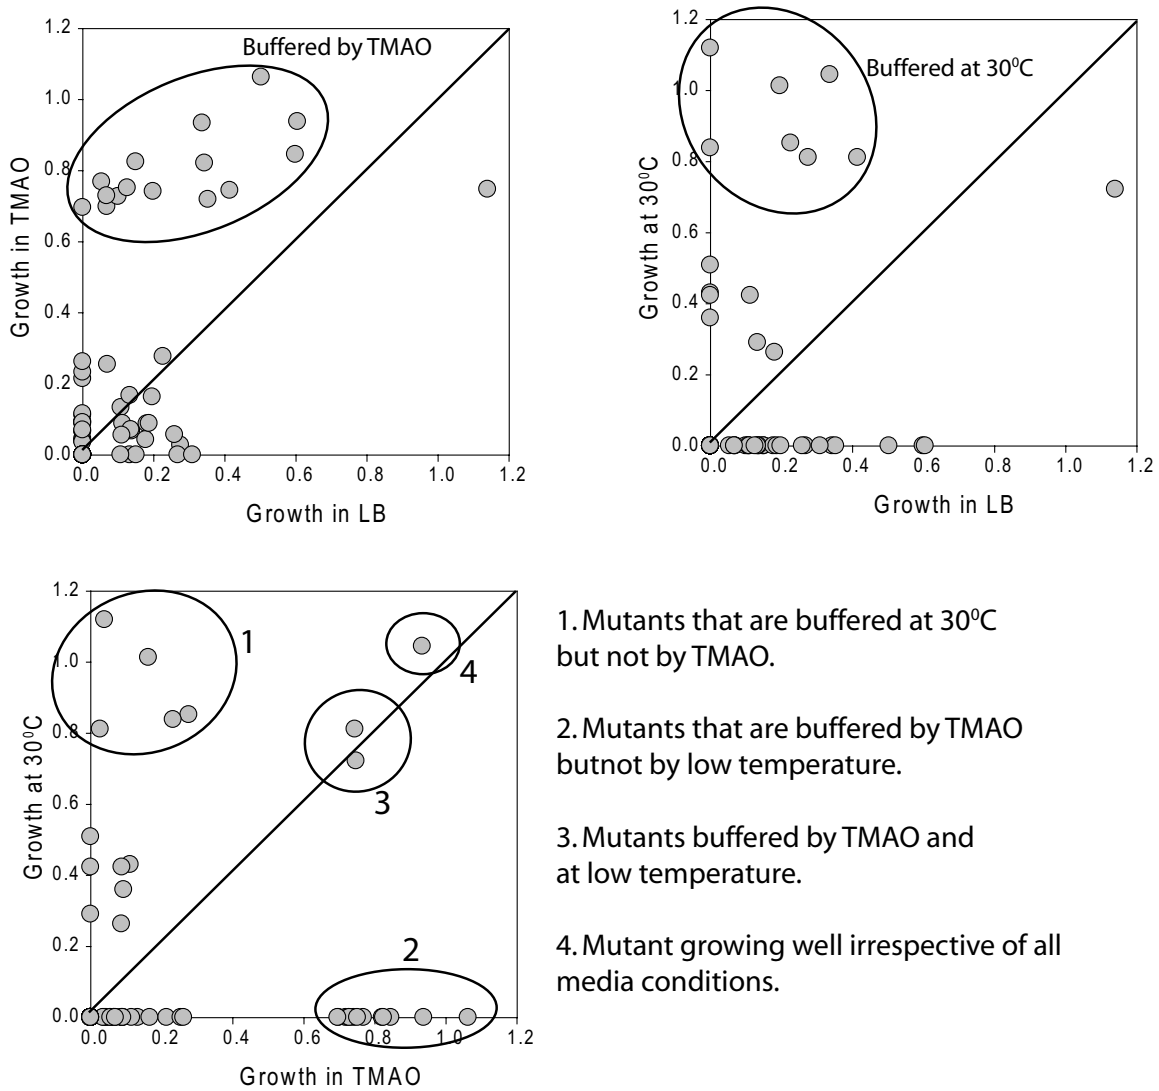

1. Mutants that are buffered at 30°C but not by TMAO.

2. Mutants that are buffered by TMAO but not by low temperature.

3. Mutants buffered by TMAO and at low temperature.

4. Mutant growing well irrespective of all media conditions.

Growth of the different mutants are plotted against growth in presence of osmolyte or TMAO to obtain the mutants that are buffered at the respective conditions. Growth was measured as OD at 600nm and normalized with respect to the growth of WtGmR at each condition. Diagonal shows the expected trend for mutants that are equally active at both the growth conditions plotted in the X and Y axis. Mutations that are significantly off the diagonal are buffered and are circled for demarcation.

Figure 13

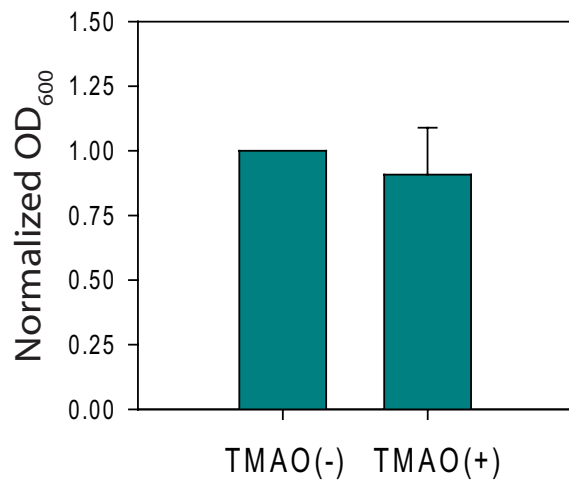

Wild-type Gm-R transformed DH5a cells were grown in medium containing 0.1% Arabinose and Gentamicin in presence or absence of TMAO. Growth was performed in microwell plate incubated at 37°C without shaking. The growth was measured as absorbance at 600nm. Data plotted is normalized with respect to growth without TMAO.

Figure 14

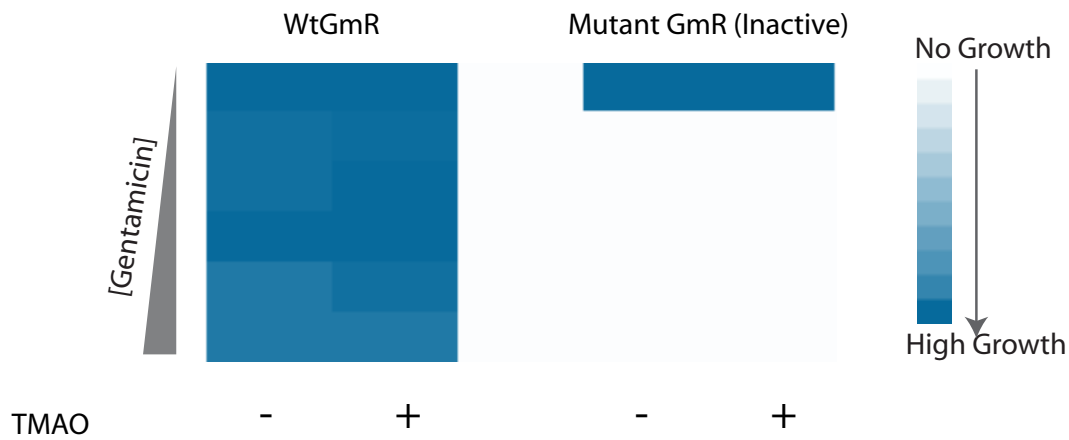

*E. coli* cells transformed with WtGmR or an inactive GmR was grown at six different concentrations of Gentamicin ranging from 2ug/ml to 134ug/ml, and in presence of 0.1% Arabinose. Growth is measured by OD<sub>600</sub> and is plotted as a colormap. Cells transformed with WtGmR is able to grow indentially in presence and absence of TMAO. Inactive mutant does not support growth above 2ug/ml of gentamicin both in presence and absence of TMAO. This indicates that TMAO does not reduce the efficacy of gentamicin.



Figure 15

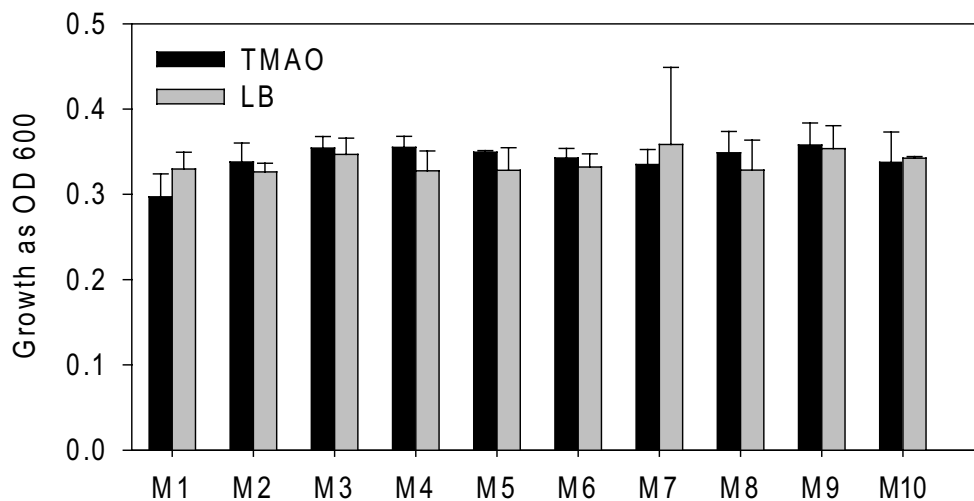

E. coli cells transformed with the mutant plasmids were grown in presence of 0.1% of arabinose and 1 mg/ml of gentamicin, a concentration that was found to be insufficient to arrest the growth of non-transformed cells. OD600 of the cultures are plotted after overnight growth in presence and absence of TMAO.

Figure 16

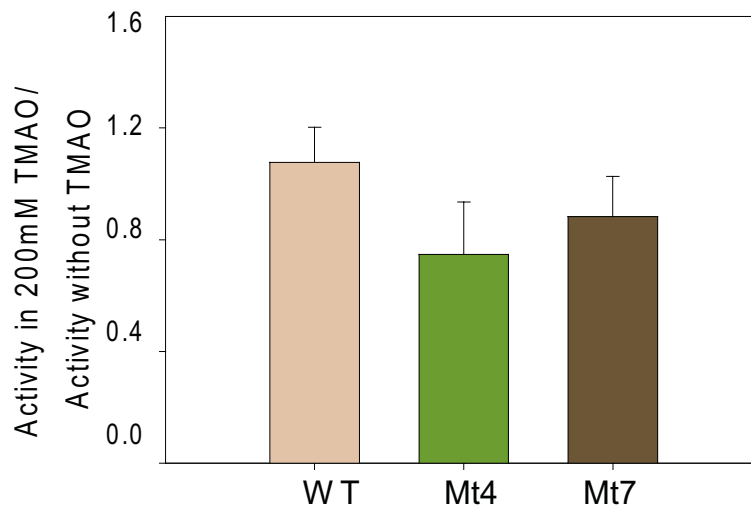

Specific activity of mutants with TMAO.

Activity in presence of 200mM TMAO for 100nM solution of purified proteins (wtGmR, Mt1 and Mt2) is normalized with respect to the activity obtained in absence of TMAO and plotted.

Figure 17

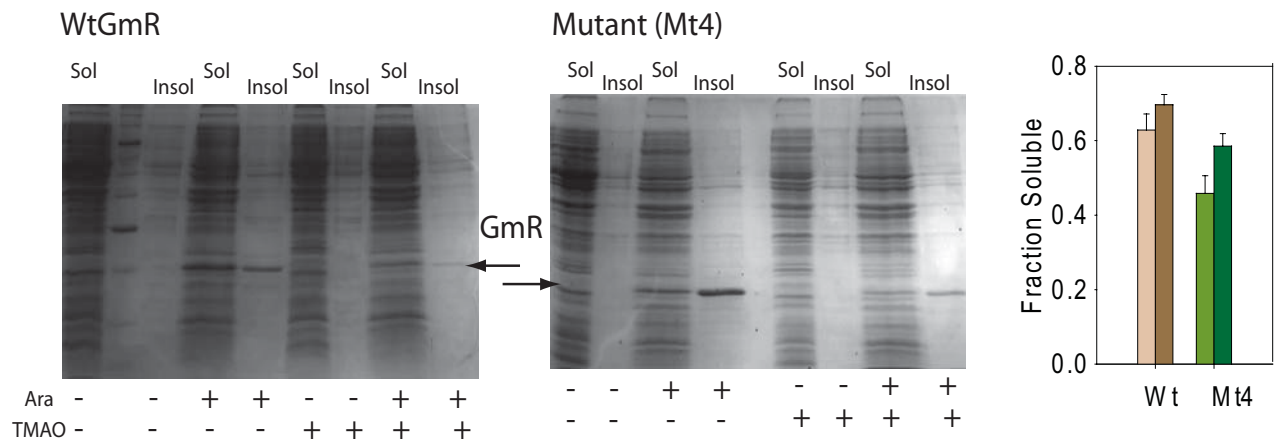

Solubility of WtGmR and Mt4 in presence and absence of TMAO in vivo. Quantitation of the amount of protein was done using ImageJ software.

Figure 18

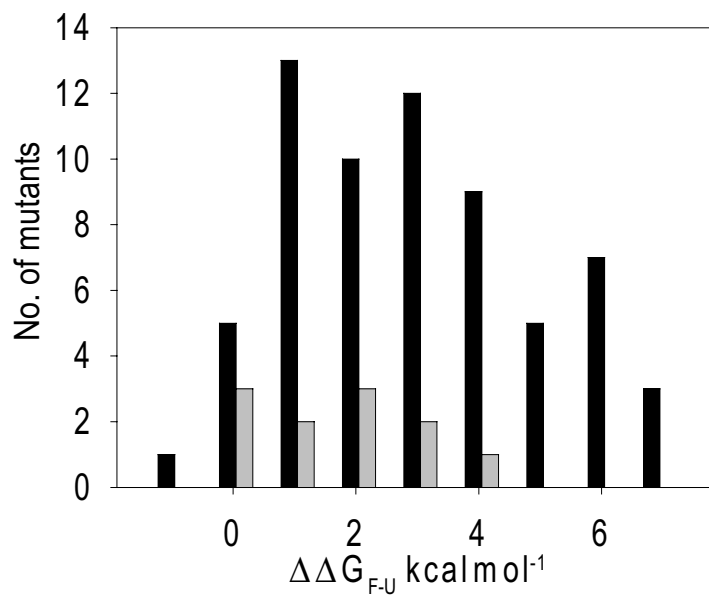

$\Delta\Delta G$  values were calculated for all the GG-mutants using FoldX. Histogram of the  $\Delta\Delta G$  distribution is plotted (black bars). Majority of the mutations are destabilizing, with the plot showing non-gaussian distribution. TMAO-buffered mutations, shown in grey bars, are distributed in the lower range of  $\Delta\Delta G$  values. The values for  $\Delta\Delta G_{FU}$  were calculated as

$$\Delta\Delta G_{FU} = \Delta\Delta G_{FU} (\text{mutant}) - \Delta\Delta G_{FU} (\text{Wild type})$$

Figure 19

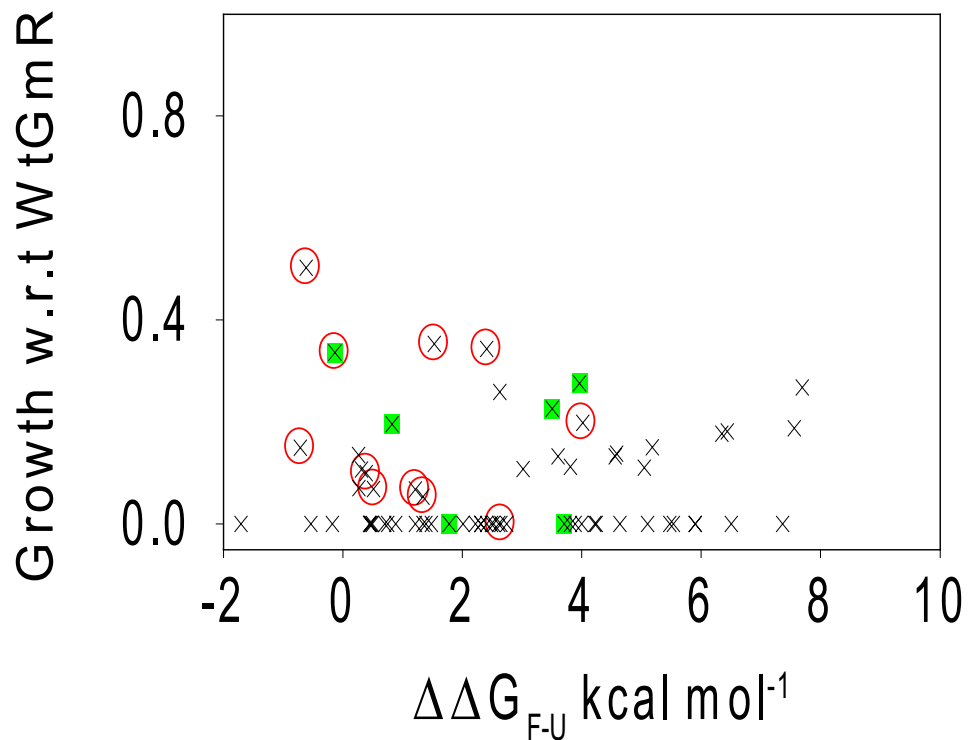

Activity of the different GG-mutants are plotted against the predicted  $\Delta\Delta G_{FU}$  values from FoldX due to the corresponding mutations. Mutants buffered by TMAO are circled in red and the mutations rendered active at lower temperature are boxed with green. Though the preponderance of active protein is slightly more in the low  $\Delta\Delta G$  region compared to the high  $\Delta\Delta G$  regions, there is no statistically significant correlation between the two values.

Figure 20  
Short PCR

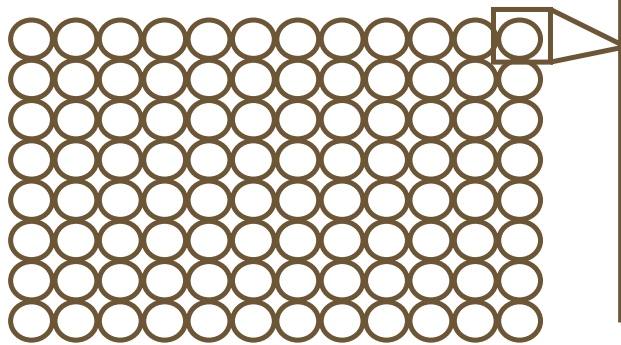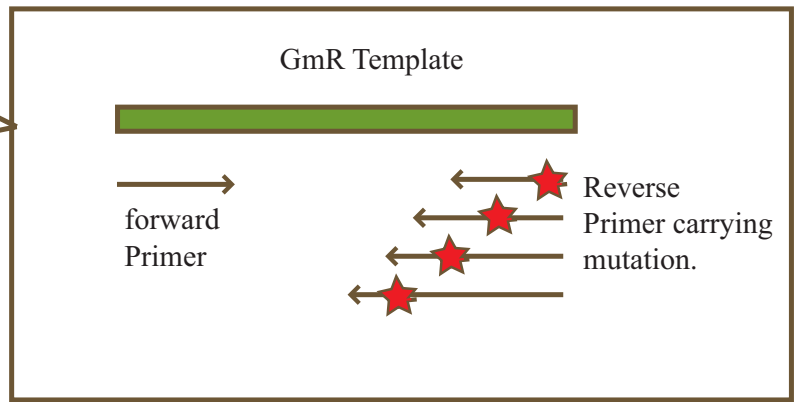

Long PCR

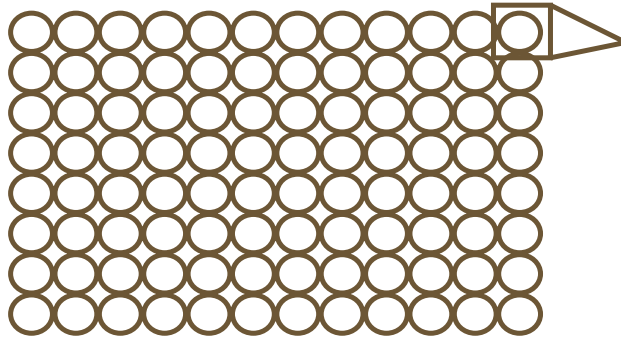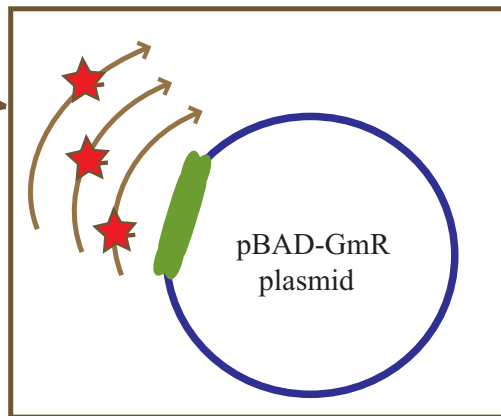

Transformation into E.coli DH5alpha to obtain mutant colonies

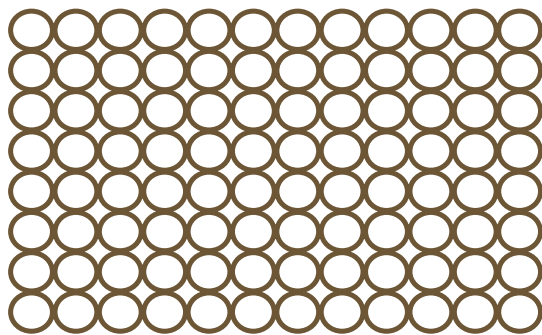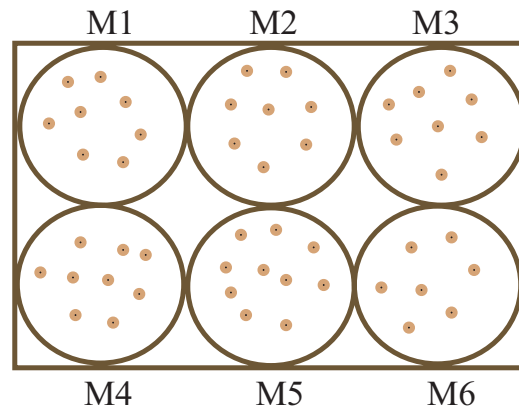

Mutant colonies were scraped into LB and pooled followed by plasmid preparation to obtain pool of mutant plasmids

Schematic for generating single-site random mutant library for GmR. Primers containing NNK substitution for each codon was obtained in 96-well format. Individual short PCR was carried out using a constant forward primer and the randomized reverse primer. The reverse primers contain MNN substitution to encode NNK substitution in the gene. The long-PCR was carried out individually to amplify the whole plasmid and were digested with DpnI subsequently to remove wildtype plasmid. These were then transformed in cells to obtain mutant colonies. Same set of reactions were performed without primers as a control. The control reaction typically yielded less than 5% of the colonies obtained in the mutant plates. The mutant colonies for each position were pooled together and grown to obtain pooled plasmid representing mutants throughout the gene.

Fig 21

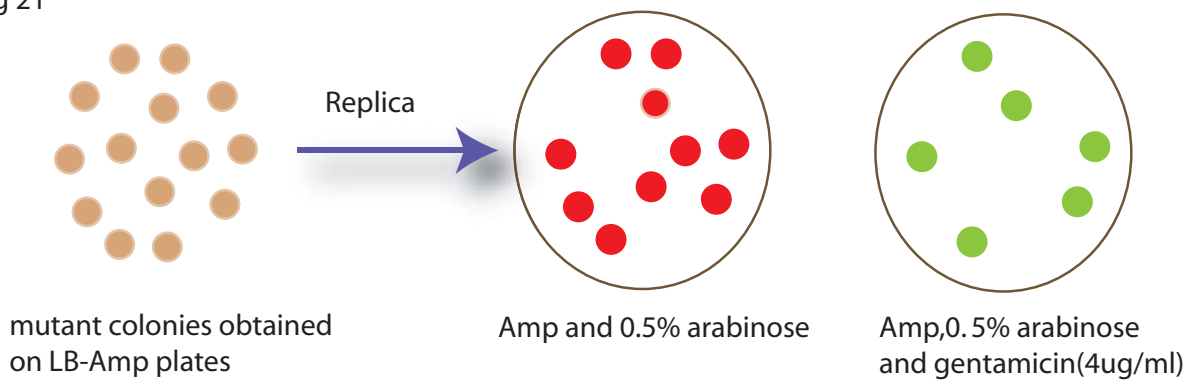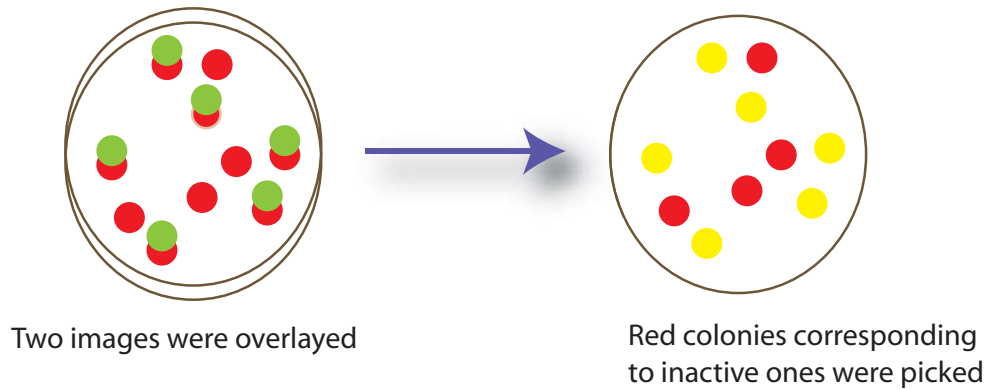

763 GmR Inactive mutants were picked into LB Broth in 96-well format out of which 500 mutants were screened for TMAO dependence.

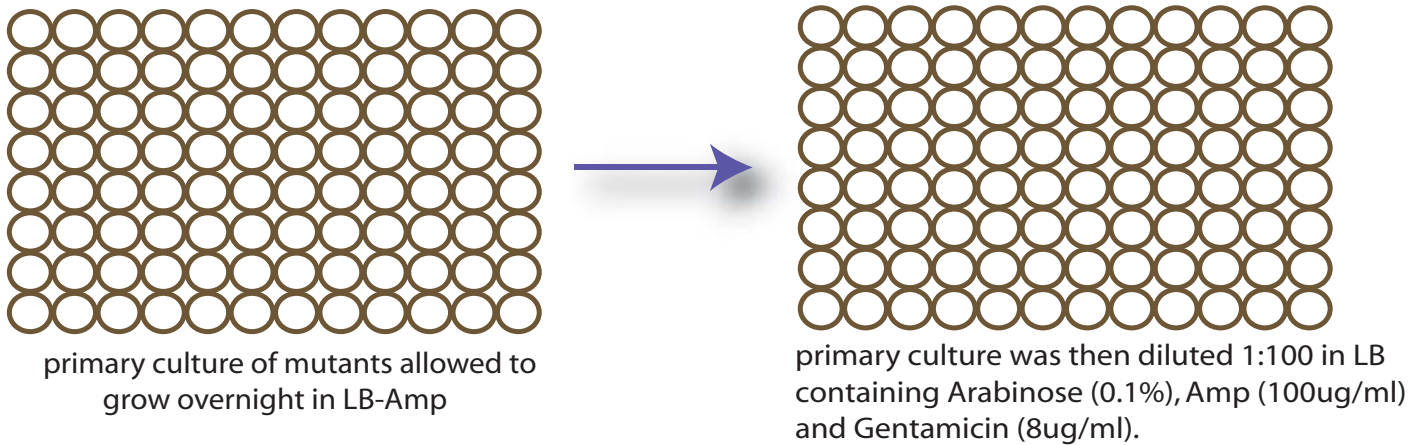

Clones were plated onto LB-amp without gentamicin selection. Following growth the colonies were replica plated onto two plates, one containing gentamicin and one without. Plates were photographed and image analysis tools were used to identify colonies that were growing better in the absence of gentamicin. The selected clones were picked from the plate without gentamicin selection and inoculated in LB-Amp for further growth.

Fig 22

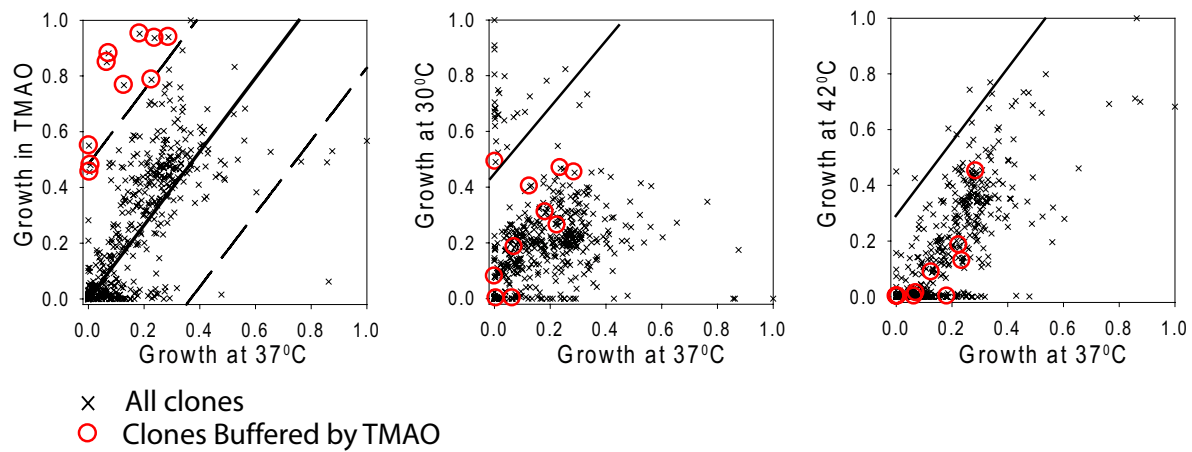

Growth of different mutant clones are plotted to obtain differential growth pattern. Left Panel: Growth in TMAO is plotted against growth in LB to obtain the mutants that grew significantly better in presence of TMAO than in its absence. This was obtained by obtaining a 95% prediction interval around a linear regression through the scatter. Clones falling above the 95% prediction interval were taken to be buffered by TMAO and are circled in red. Middle panel: Growth comparison of clones at 30°C vs normal growth. The clones that showed TMAO buffering are circled in red. Only one clone exhibit better growth at low temperature than at normal temperature. Right Panel: Similar analysis for growth of clones at 42°C vs normal growth. TMAO-buffered mutants are not buffered at elevated temperatures.



Fig 23

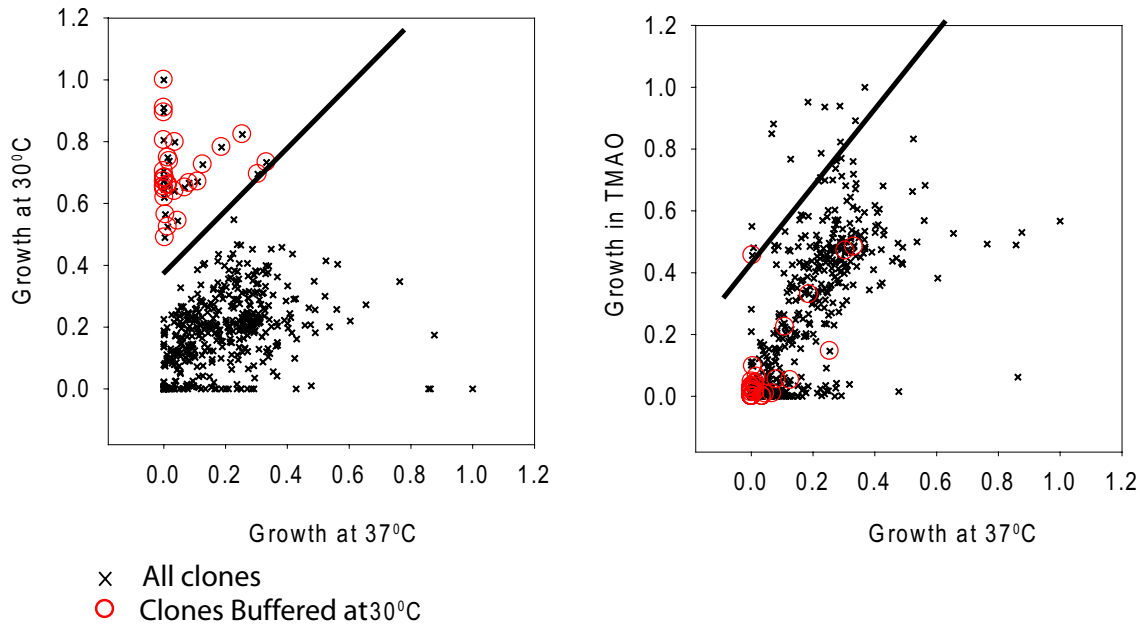

Growth of different mutant clones are plotted to obtain differential growth pattern. Left Panel: Growth comparison of clones at 30°C vs normal growth. The clones that showed temperature sensitive behaviour are circled in red. This was obtained by obtaining a 95% prediction interval around a linear regression through the scatter. Clones falling above the 95% upper prediction interval were taken to be buffered by low temperature and are circled in red. Right Panel: Similar analysis for growth of clones in presence of TMAO vs normal growth. Mutants buffered by low temperature are circled red. One of these mutants show better growth in TMAO than in its absence. Thus temperature sensitive mutants and TMAO-dependent mutants form non-identical sets.

Figure 24

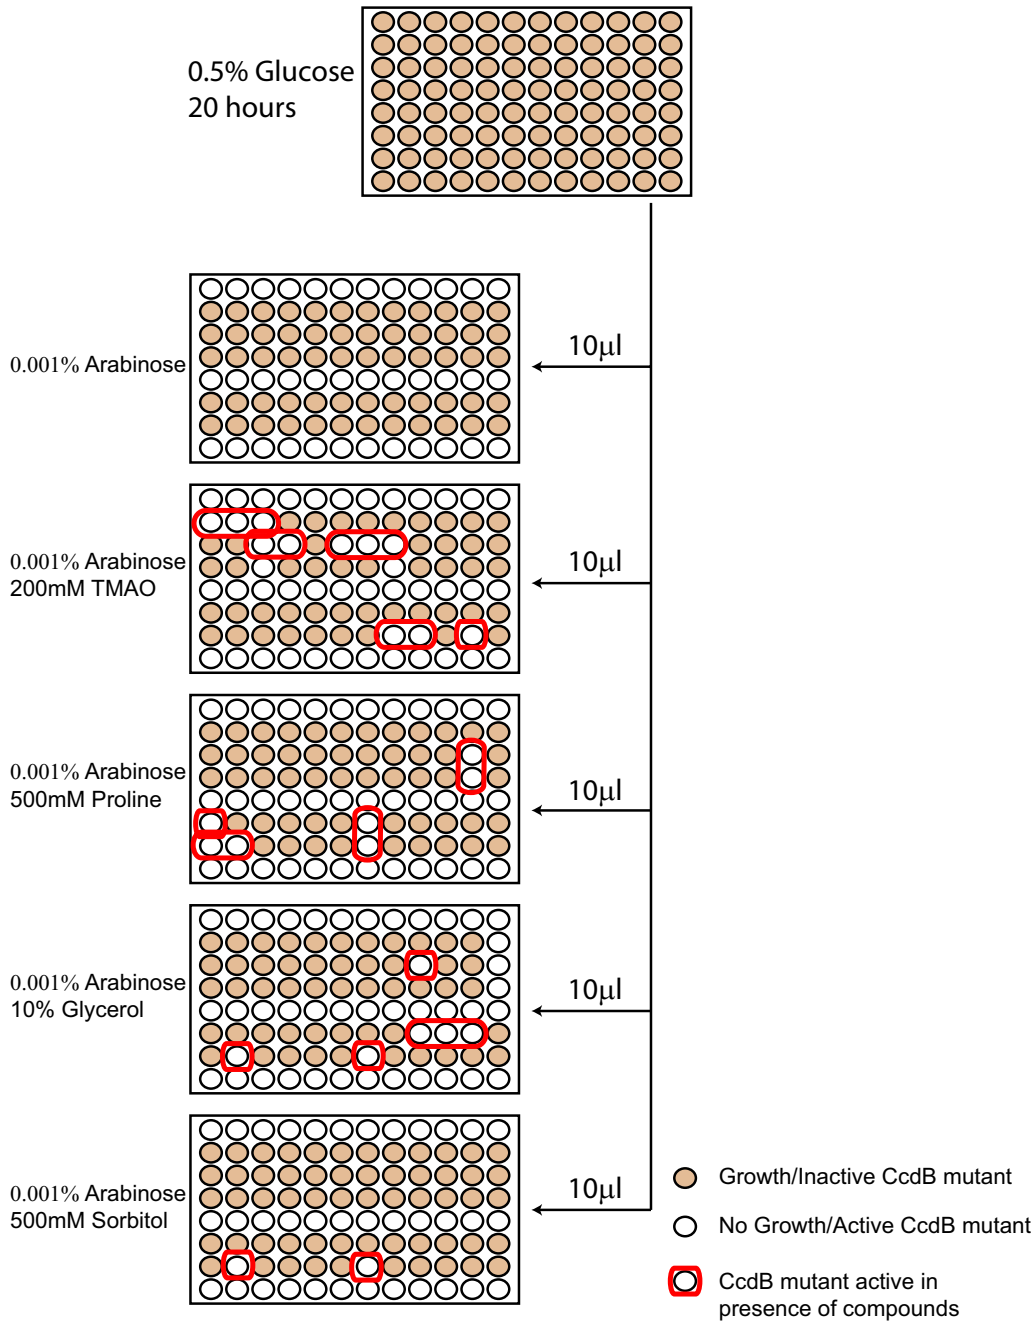

Schematic for the characterization of CcdB activity: CcdB mutants were grown at 37°C in the presence of 0.5% Glucose, to repress the expression from Ara promoter, for 20 hours. 10μl of this culture was inoculated in LB containing 0.001% Ara to induce low level expression of CcdB containing the different osmolytes. Decrease in OD<sub>600</sub> indicates increased activity of CcdB mutant in presence of specific osmolytes.

Figure 25

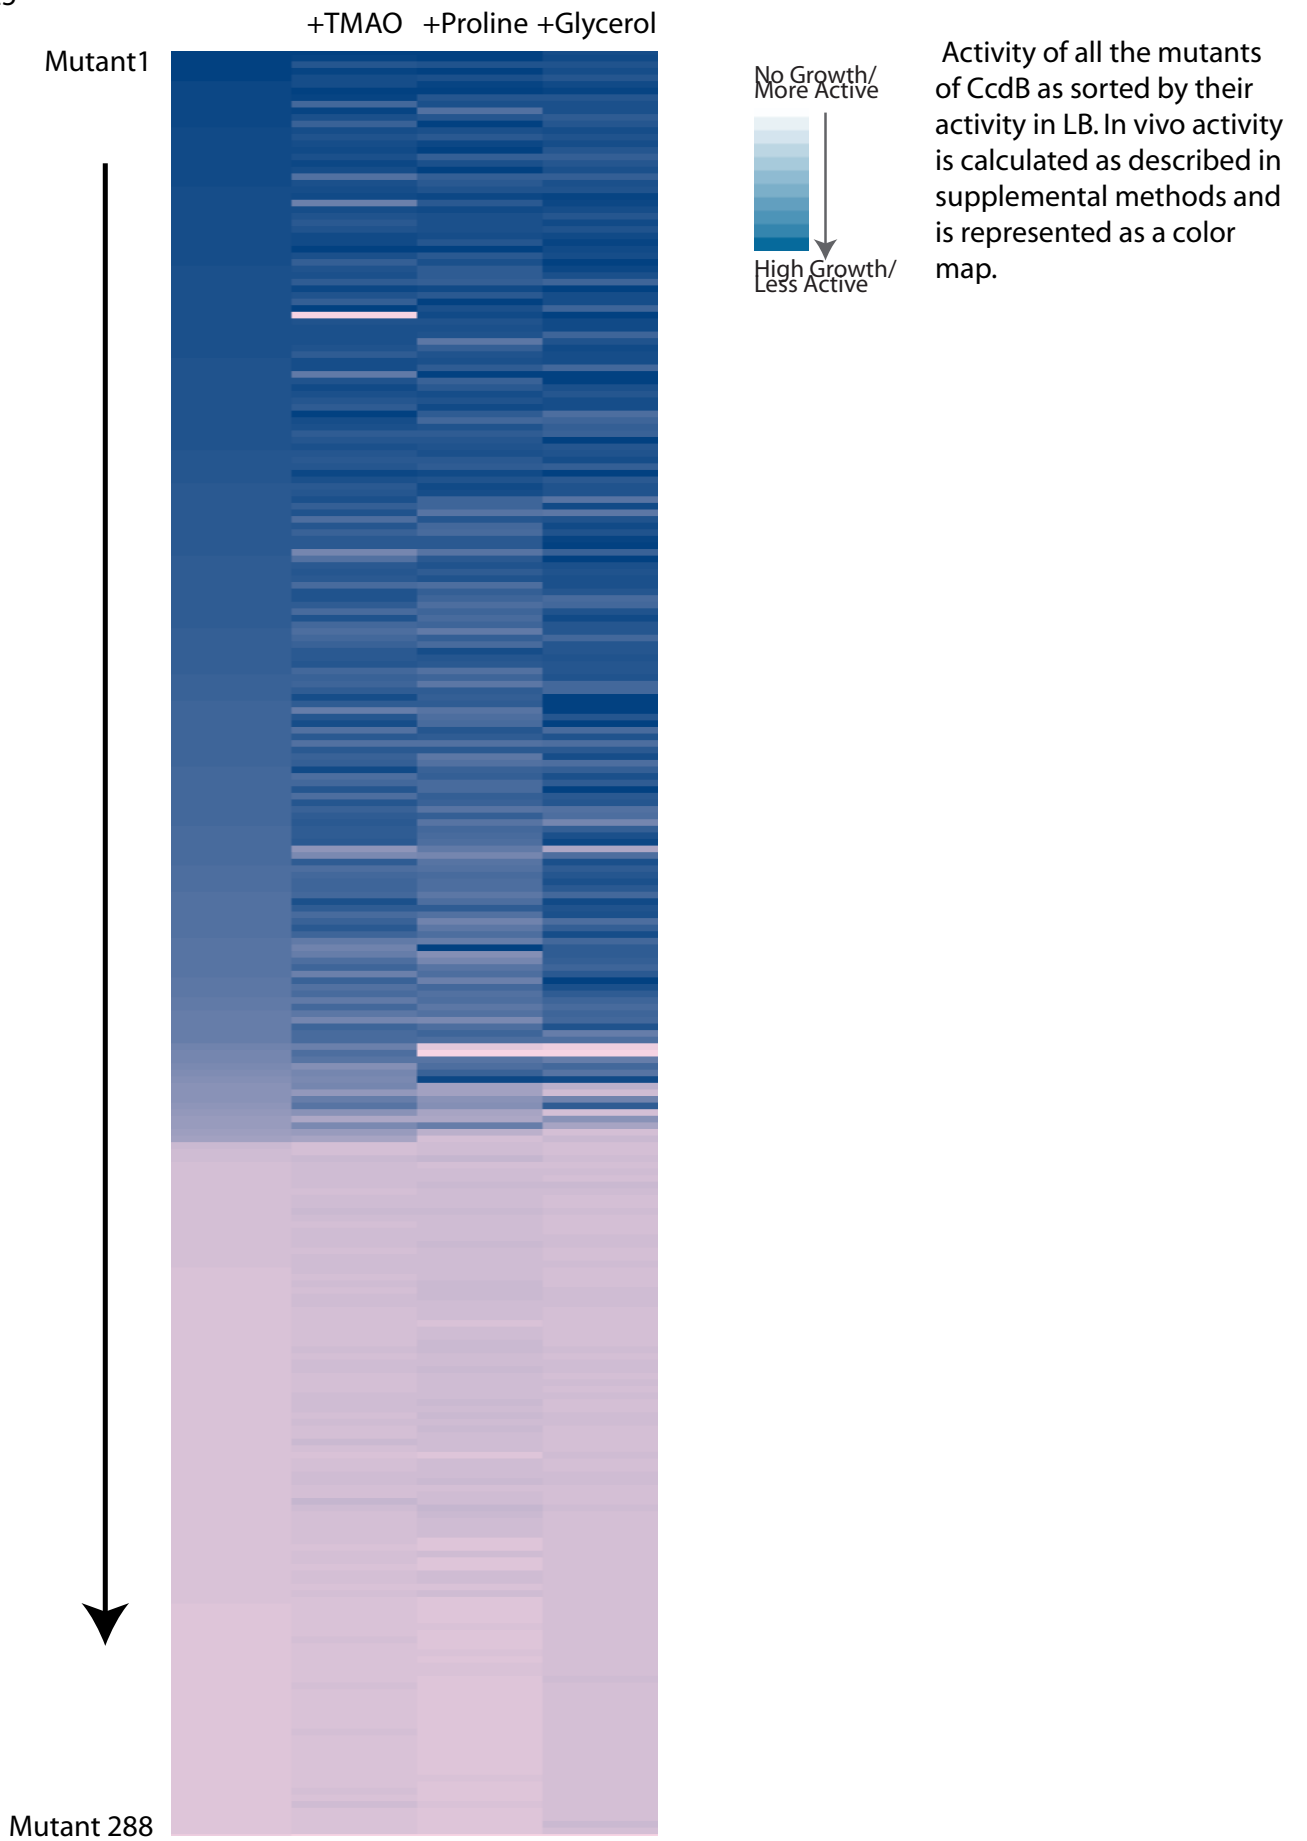

Figure 26

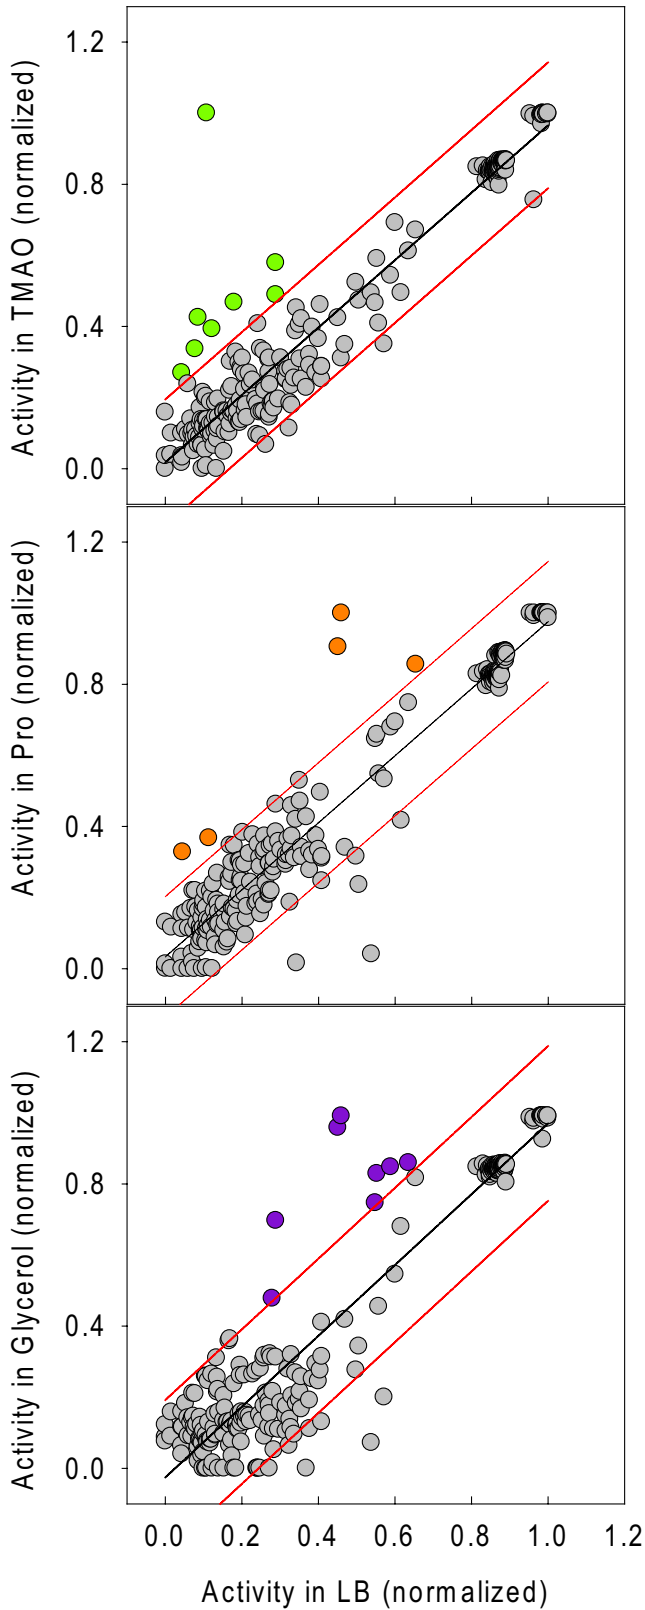

Activity of CcdB was estimated from the decrease afforded by each mutant from the growth of a strain transformed with an inactive mutant. Activity in presence of the osmolytes were plotted against activity in absence of osmolytes. A linear regression was performed (dark line) and the activities seem to correlate quite well in presence or absence of osmolytes. 95% prediction interval was obtained from the regression (red lines) and the clones showing positive deviation from the upper prediction cutoff were designated as the mutations that are buffered. The top panel shows in green the mutants that are buffered in TMAO, in the middle panel, the mutants that are buffered in Proline are shown in orange and in the bottom panel, the mutants that are buffered by glycerol is shown in magenta.

Figure 27

### Activity assay for CcdB mutants

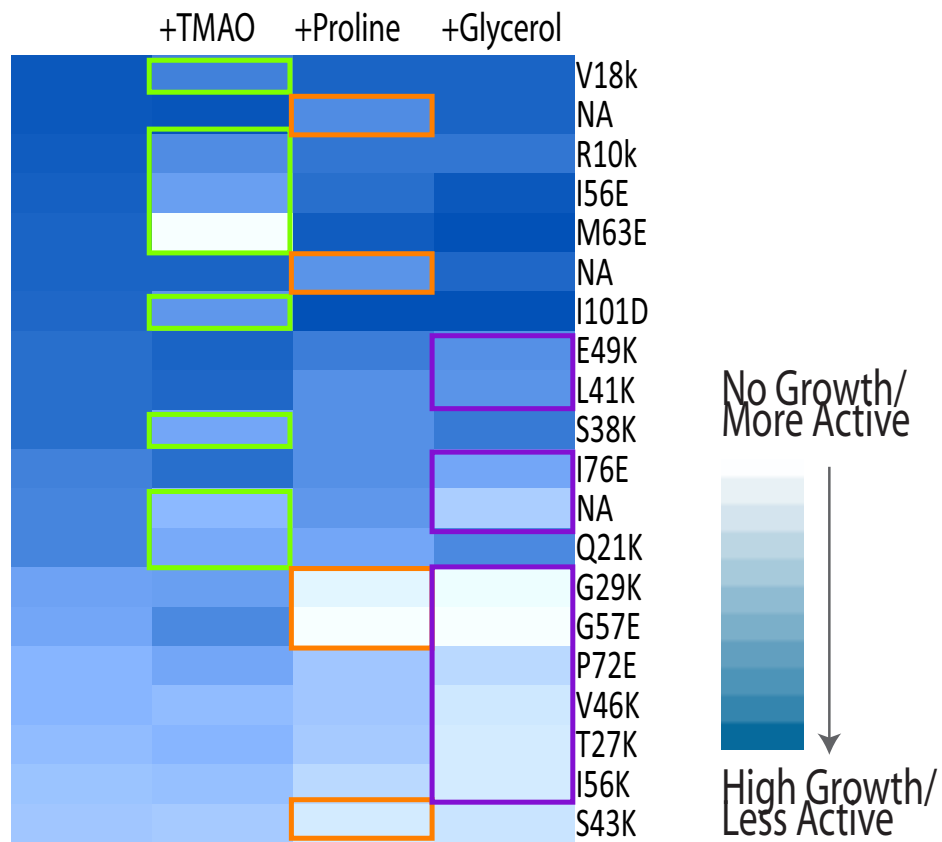

Color map for the growth of CcdB mutants when grown in different conditions. Since CcdB is a toxin, higher growth which is indicated by darker shades of blue, indicates less activity, whereas white indicates a fully active clone.

Figure 28

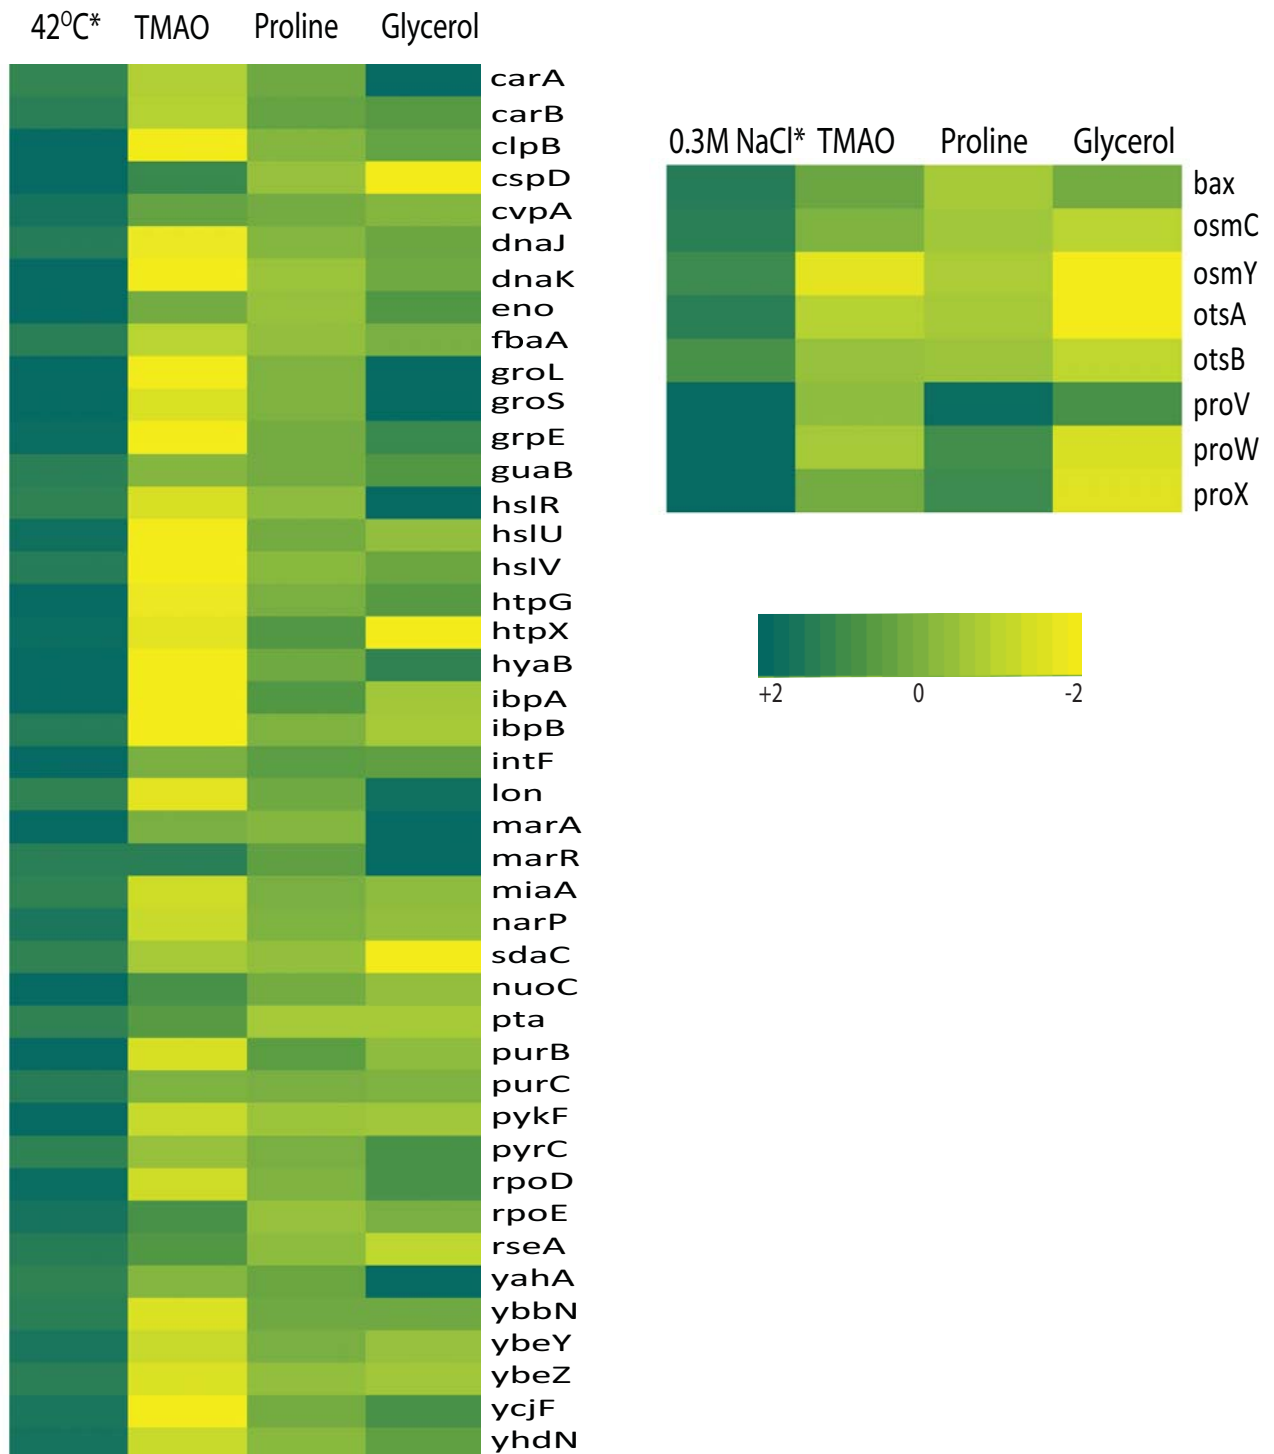

Stress response pathways do not mediate osmolyte mediated buffering. Microarray analysis showing the alterations in *E. coli* gene expression in presence of different osmolytes. The genes found to be upregulated in heat shock and osmotic shock were obtained from the supplemental materials of Gunasekera et al 2008<sup>2</sup> and were plotted here along with their fold change values to compare these expression profiles. Genes upregulated upon Heat Shock (Left Panel) and Osmotic Shock (Right Panel) were compared with their expression values in presence of the different osmolytes.

Fig 29

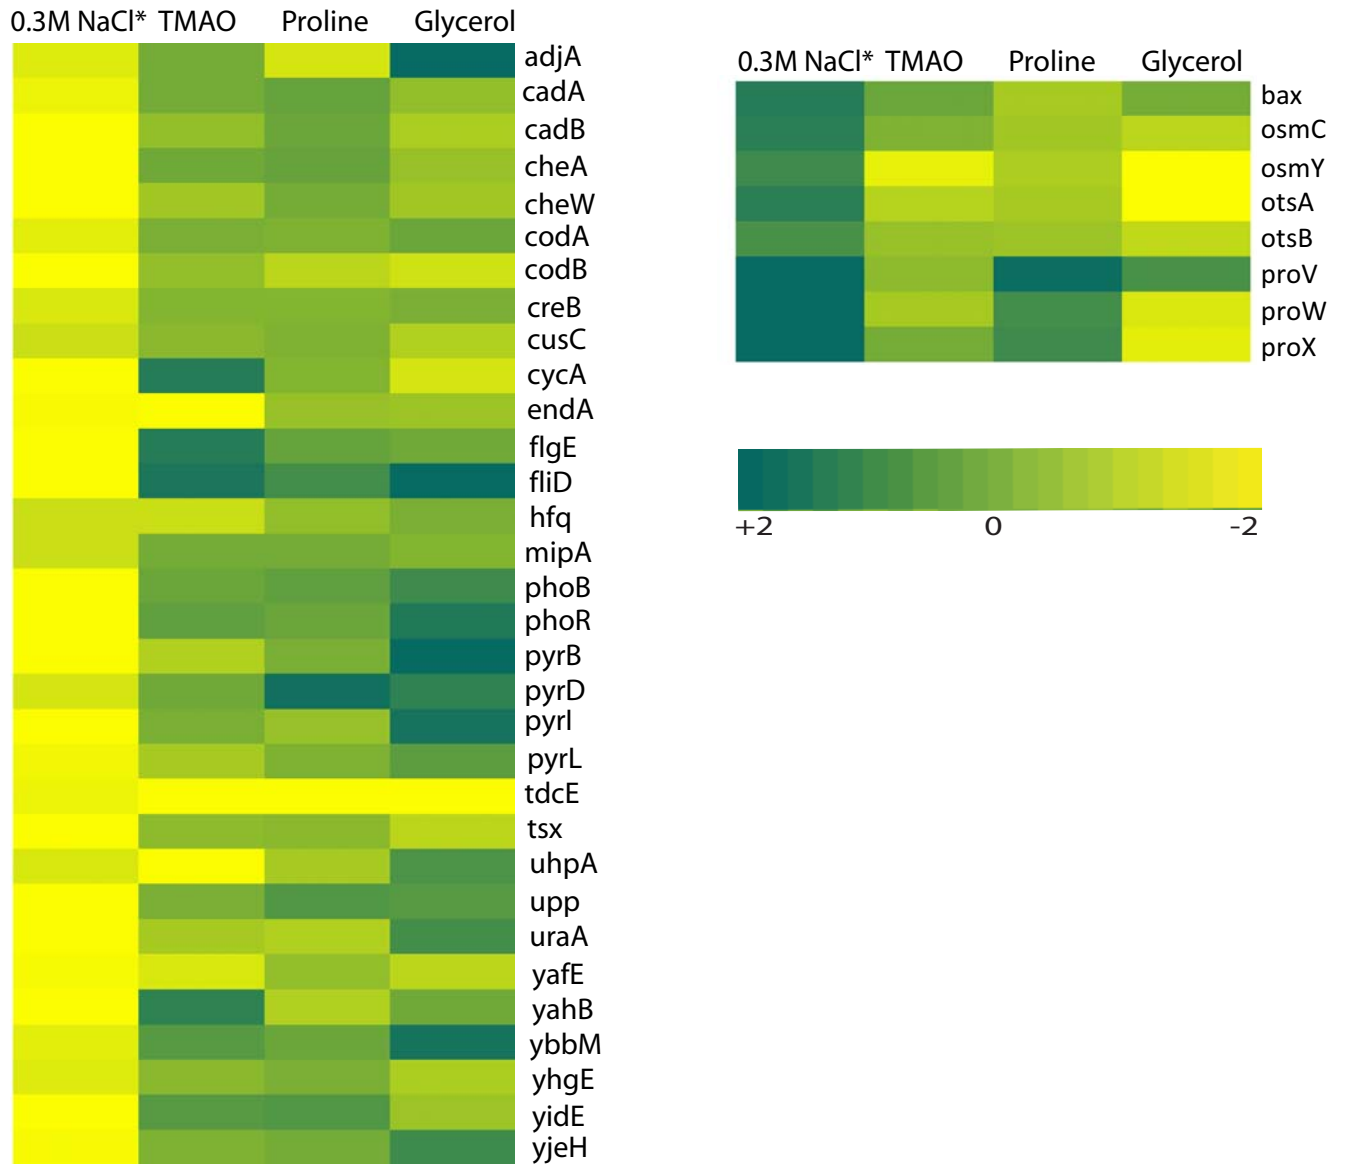

Genes that are downregulated in Heat shock (lef panel) and (right panel) osmotic shock are plotted alongwith their fold change values to compare their expression profiles in presence of different osmolytes.

Fig 30

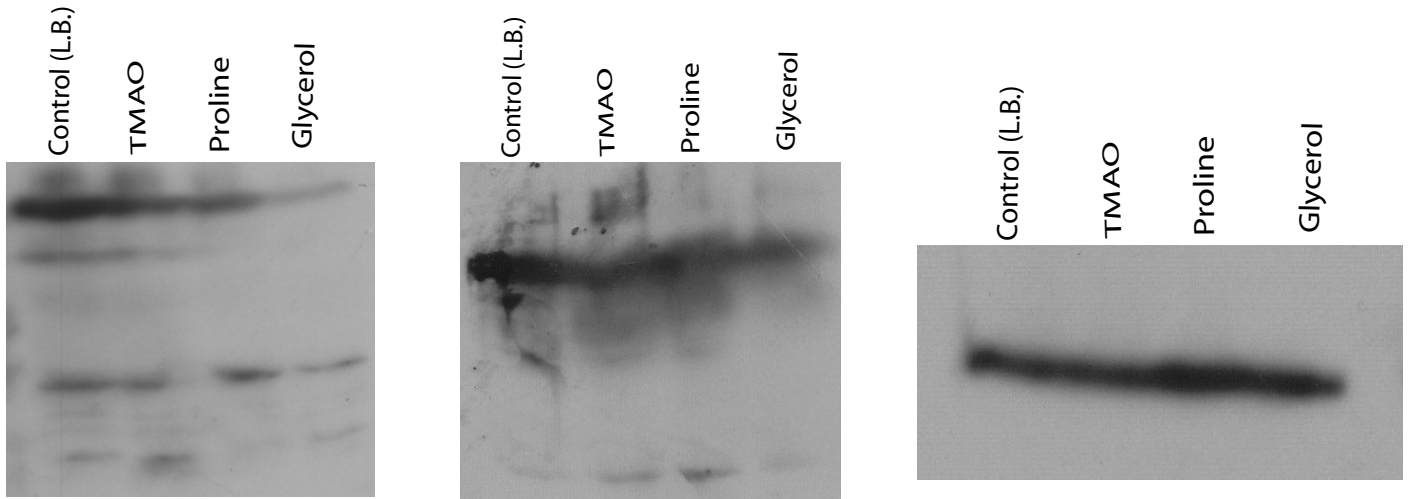

osmolytes do not alter the protein levels of Molecular Chaperones. Expression level of DnaK(left panel), GroEL ( middle panel) and trigger factor (right panel) was measured using western-blotting.



Figure 31

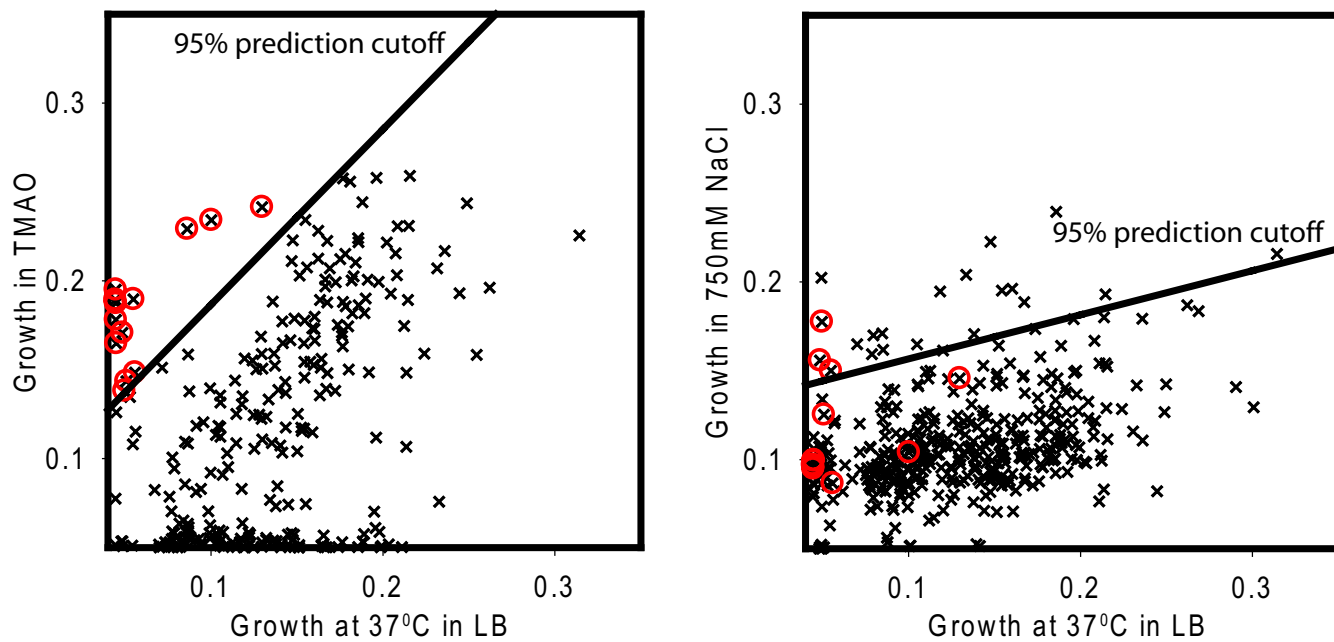

**Gm-R random mutants buffered under osmotic shock conditions are distinct from TMAO dependent ones** : Growth for 500 mutant clones of Gm-R in presence of the osmolytes or at high salt concentration is plotted against normal growth in LB. 95% prediction interval was obtained from the regression (black line) and the clones showing positive deviation from the upper prediction cutoff were designated as the mutations that are buffered. Left Panel: In red are circled the clones that are buffered in presence of TMAO. Right Panel: The same clones are circled to show the activity of these clones in presence of elevated salt. Only three of the ten TMAO buffered clones show buffering in presence of hyperosmotic stress.

Fig 32

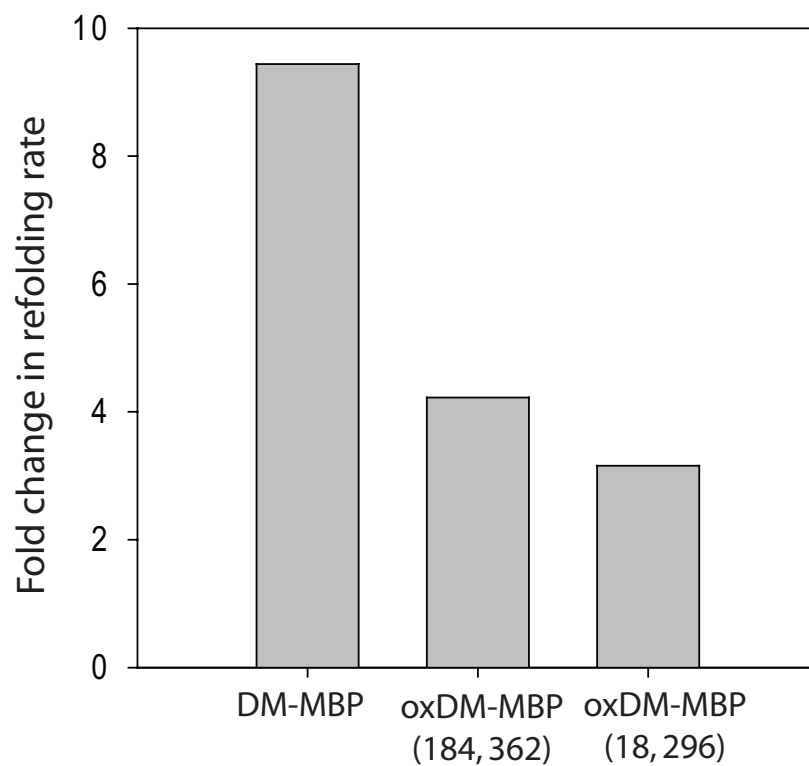

Refolding of DM-MBP and its variants were performed in vitro as explained previously. In this case 500mM Trehalose was present in the refolding buffer to examine the effect of trehalose on refolding activity. Fold change was obtained by dividing the rate obtained upon folding in presence of trehalose by the rate obtained upon refolding in the absence of trehalose.

Figure 33

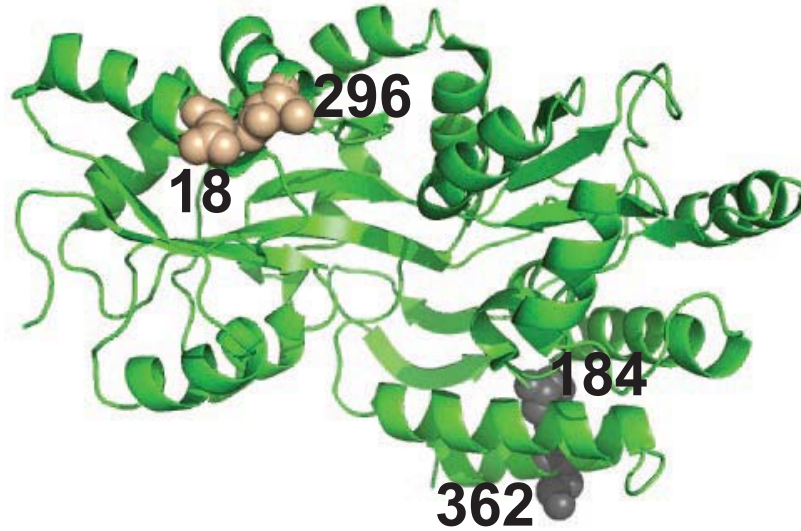

Crystal structure of MBP(1omp) indicating the residues substituted with cysteines to obtain two disulfide variants of DM-MBP; 18 and 296 (beige), 184 and 362 (grey).

Figure 34

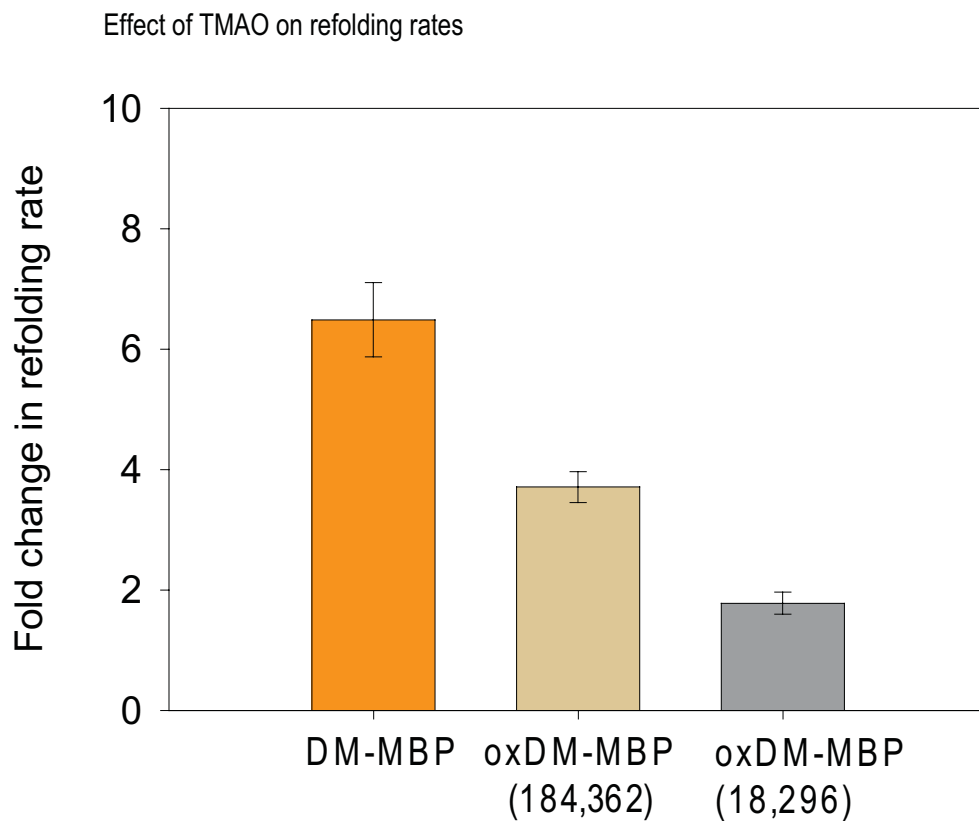

Folding rates of DM-MBP, oxDM-MBP(18,296) and oxDM-MBP(182,362) were obtained in presence and absence of TMAO. Rates obtained in presence of 0.5 M TMAO were normalized with respect to the rate obtained in absence of TMAO to obtain the fold change in refolding rate in presence of 0.5 M TMAO. Refolding reactions were carried out as described previously (Fig.1h).
